# Supplementary material for: A high-throughput small molecule screen identifies farrerol as a potentiator of CRISPR/Cas9-mediated genome editing
Source: eLife. 2020 Jul 9;9:e56008. doi: 10.7554/eLife.56008 (PMC7380943; doi:10.7554/eLife.56008)
Supplement: Figure 1—source data 1. [file elife-56008-fig1-data1.xlsx]

## Sheet: Fig.1G
	Figure 1G. The list of small molecule compounds and their influences on DNA repair
	NO.	Small Molecular Compounds	Log10 (tdTomato)	Log10 (GFP)
	1	Chlorogenic Acid	-0.1323	0.0025
	2	Oleuropein	0.0478	0.0183
	3	Lobetyolin	0.1305	0.048
	4	Glycitein	0.1004	0.0336
	5	Imperatorin	0.3296	0.2534
	6	Isoimperatorin	0.0146	-0.0219
	7	Polygalacic Acid	-0.0314	0.0067
	8	Rebaudioside A	0.0942	0.0705
	9	Hesperidin	0.2576	0.1955
	10	Rhein	-0.07	0.0809
	11	Chrysophanol	0.1342	0.0473
	12	Paeonol	0.1695	0.076
	13	Glycyrrhetinic Acid	0.1578	0.0065
	14	Baicalein	0.1704	0.2033
	15	Sophocarpine	0.165	-0.0254
	16	Artemether	0.1859	0.1247
	17	Amygdalin	0.1074	-0.0091
	18	Caffeic Acid	0.1563	0.0711
	19	Rotundine	0.1116	-0.0594
	20	Astilbin	0.1091	0.0148
	21	Shikimic Acid	0.1701	0.1275
	22	Aesculin	0.1482	0.023
	23	Sinomenine	0.2736	0.1537
	24	Oleanolic Acid	0.133	0.0316
	25	Cpu-0065	0.1658	0.0143
	26	Muscone	0.229	0.1001
	27	Silybin (Silymarin)	0.1834	0.1306
	28	Lutin	0.2677	0.0637
	29	Arbutin	0.0689	-0.0725
	30	Synephrine	0.1084	0.0915
	31	Tetrahydropalmatine	0.0375	-0.0787
	32	Bergenin	-0.0334	0.0025
	33	Gentiopicrin	0.0966	-0.0046
	34	Sesamin	0.1848	0.0857
	35	Hordenine	0.1107	-0.0244
	36	Sennoside A	0.1309	0.0438
	37	Sennoside C	0.1478	-0.0248
	38	Sennoside D	-0.2974	0.2736
	39	P-Coumaric Acid	0.2125	0.1004
	40	Asiaticoside	-0.0111	-0.0035
	41	Tectoridin	0.192	0.1159
	42	Nicotinamide	0.1857	0.1388
	43	Cryptochlorogenic Acid	0.1681	0.1017
	44	Isochlorogenic Acid C (4,5-Di-O-Caffeoylquinic Acid)	-0.0644	0.021
	45	Daidzin	0.03	-0.2336
	46	Dihydrocapsaicin	-0.2561	-0.2625
	47	1,3-Di-O-Caffeoylquinic Acid	-0.0833	-0.2632
	48	Phloridzin	0.0458	0.0097
	49	Cynanchum Otophyllum Aglycon A	0.0604	-0.2487
	50	Nomilin	-0.2257	-0.2761
	51	Mogroside Ⅴ	0.0038	-0.025
	52	Quercitrin	0.0282	-0.0507
	53	Epimedin B	-0.0516	-0.0634
	54	Epimedin C	-0.0883	-0.0776
	55	Saikosaponin c	-0.1038	-0.0431
	56	Arctiin	-0.2744	-0.1873
	57	Peimine	-0.0412	-0.07
	58	Forsythin	-0.0814	-0.0743
	59	Jujuboside A	-0.0264	0.0016
	60	Jujuboside B	-0.0537	-0.0586
	61	Betulinic acid	0.0512	0.0052
	62	Liquiritin	-0.0906	-0.084
	63	Picroside-Ⅲ	0.0735	-0.1311
	64	Capsaicin	-0.0984	-0.0748
	65	Gramine	-0.0905	0.014
	66	Piperine	0.0832	0.0542
	67	CPU-0199	-0.0255	0.0006
	68	CPU-0204	0.053	0.0451
	69	Isopsoralen	-0.0598	-0.0427
	70	(+)-Catechin	-0.0449	0.0406
	71	Cholic acid	-0.0733	-0.0347
	72	CPU-0211	-0.0311	0.0398
	73	Deoxycholic acid	0.0026	-0.0363
	74	Procyanidin (Procyanidin B5)	0.0379	0.0587
	75	Eleutheroside E	-0.0597	0.1189
	76	Dauricine	-0.2939	-0.0332
	77	Curcumenol	0.1315	0.1288
	78	Rhynchophylline	-0.0611	-0.1496
	79	Germacrone	-0.1031	0.0003
	80	Orientin	0.0493	0.0454
	81	Cimifugin	-0.0036	0.0139
	82	AstragalosideⅠ	0.0911	0.0098
	83	Astragaloside Ⅲ	0.1463	0.137
	84	Huaihua Biflavonoids	0.0557	0.0896
	85	Timosaponin b- II	-0.1314	0.1917
	86	CPU-0253	-0.1092	-0.0477
	87	Vitexin	0.1257	0.172
	88	Vitexicarpin	-0.2027	-0.0426
	89	Fargesin	0.1157	0.0593
	90	Barbaloin	0.1192	0.0217
	91	Atractylenolide I	0.0435	0.0524
	92	Sodium Aescinate	0.0537	0.1005
	93	Rubimaillin	-0.0243	0.0202
	94	Clinopodiside A	0.0428	-0.0569
	95	Hydroxysafflor yellow A	0.0597	0.0258
	96	Madecassic acid	0.1434	0.0926
	97	Helicide	0.1198	0.1881
	98	Epigoitrin	0.2117	0.17
	99	Quercetin-3-0-arabinoside	0.2107	0.1645
	100	Seopoletin	0.2154	0.2083
	101	Fraxinellone	0.1128	0.1046
	102	Hederagenin	-0.0988	-0.021
	103	CPU-0385	0.1287	0.0021
	104	Akebiasaponin D	-0.2901	0.3275
	105	Daphnetin	0.1462	0.0636
	106	Aminoacetic acid	0.1508	0.1847
	107	Nuciferine	0.1373	0.1139
	108	CPU-0397	0.2807	0.1254
	109	Sophoricoside	0.0013	0.1846
	110	Murrayone	-0.3122	0.0921
	111	Spironolactone	-0.0059	0.1499
	112	Aristolochic acid A	0.0578	0.2035
	113	2,3,5,4＇-Tetrahydroxystilbene-2-Ο-β-D-glucoside	-0.0099	0.0096
	114	Pterocarpan	-0.0555	0.1116
	115	Thymol	0.0691	0.1077
	116	Nevadensin	0.0179	-0.1106
	117	Isoferulic acid	-0.0013	0.104
	118	Biochanin A	0.0228	-0.0507
	119	Fluoran	0.0374	0.0054
	120	CPU-0426	0.0204	-0.0825
	121	Protocatechuic aldehyde	-0.2562	-0.212
	122	Epicatechin (EC)	-0.3059	-0.238
	123	Betaine	-0.3369	-0.243
	124	Hyodesoxycholic acid	-0.3224	-0.299
	125	Rosmarinicacid	-0.3283	-0.2747
	126	Saikosaponin a	-0.3149	-0.3048
	127	5-O-Methylvisamminol	-0.1396	-0.1594
	128	5-Hydroxymethyl-2-furaldehyde (5-HMF)	-0.3258	-0.1738
	129	Brucine	-0.2398	-0.2276
	130	Platycodin D	-0.2868	-0.1417
	131	Bullatine A	-0.1646	-0.197
	132	Monoammonium glycyrrhizinate	-0.0779	-0.1452
	133	Berberine hydrochloride	-0.283461	-0.126606
	134	Levodopa	0.0904878	0.0328379
	135	Ligustrazine hydrochloride	0.0790152	0.0818998
	136	Diprophylline	0.116388	0.136636
	137	Doxofylline	0.0399414	0.101435
	138	Jatrorrhizine hydrochloride	0.0362919	0.0578186
	139	Palmatine hydrochloride	0.0612172	0.0374418
	140	Dracorhodin perochlorate	0.0435606	0.134199
	141	Borneol	0.120936	0.0534268
	142	Burnate, (-)-Isoborneol	0.0577428	0.0855589
	143	CPU-0514	0.188529	0.172378
	144	Sodium Houttuyfonate	0.101665	0.0240062
	145	N-Methylcantharidimede	0.132835	0.0967991
	146	Rubidate	0.128411	0.0573328
	147	Homopiperonylonitrile	0.126926	0.10275
	148	CPU-0530	0.223241	0.214126
	149	p-Cymene	0.19557	0.0650409
	150	Phillygenin	0.115626	0.128873
	151	g-Aminobutyric acid	0.064664	0.06979
	152	Amentoflavone	0.0831474	0.092786
	153	Oroxylin A	0.0533604	0.0844188
	154	Wogonoside	-0.00302119	-0.0782819
	155	Curdione	0.0176987	-0.0258033
	156	Propyl gallate	0.0456822	-0.00690467
	157	Ellagic acid	-0.0223952	0.0142468
	158	Genipin	0.00523703	-0.0272596
	159	PinoresinolDiglucoside	-0.137927	-0.0901616
	160	Bulleyaconitin A	-0.0418445	-0.0642154
	161	Tenuigenin	0.0517375	0.0401633
	162	Astragaloside Ⅳ	0.100956	0.10884
	163	Allantoin	0.00746229	0.0289574
	164	Papaverine hydrochloride	-0.219597	-0.295778
	165	Ephedrine hydrochloride	-0.0578844	0.0488194
	166	5,7-Dimethoxycoumarin	0.0757809	0.065294
	167	Syringin, Ligustrin, Eleutheroside B	0.068128	0.0519564
	168	CPU-0696	0.0845422	-0.0563455
	169	Cynarin (1,5-Di-O-caffeoylquinic acid)	0.0943433	0.0398063
	170	Anhydroicaritin	-0.0537299	-0.0845346
	171	Cimicifugoside	0.0561678	0.0322971
	172	dl-Menthol	0.0753093	0.0823441
	173	Crocin I	0.076029	0.0171302
	174	Scoparone	0.0852772	0.0321509
	175	Formononetin	0.128139	-0.0599979
	176	10-Gingerol	0.0716932	0.0104205
	177	Isoliquiritoside	-0.232252	-0.16984
	178	Diosgenin glucoside	0.0101594	-0.0975401
	179	Coptisine Chloride	0.0576706	-0.159718
	180	Epiberberine	0.05	-0.03
	181	Salvianolic Acid D	0.104552	-0.0658201
	182	6-Gingerol	0.0838672	-0.0809162
	183	Triptophenolide	-0.25169	-0.209537
	184	Wilforlide A	0.00170982	-0.136908
	185	CPU-0766	0.150746	-0.0358067
	186	CPU-0767	0.180988	-0.029455
	187	CPU-0768	0.142313	-0.00543493
	188	Bilobalide	0.0540969	0.0451925
	189	8-Gingerol	0.0340798	0.00171513
	190	Peiminine	0.0963187	-0.0507231
	191	Tetrandrine	-0.328468	0.294101
	192	Ursolic Acid	-0.120042	0.323515
	193	Coumarin	0.081881	-0.103777
	194	Geniposide	0.172134	-0.0355402
	195	Gastrodin	0.306899	0.112866
	196	Andrographolide	0.266452	0.0511252
	197	Quercetin 7-O-Β-D-Glucoside	0.193465	0.0394018
	198	Honokiol	0.163096	0.124816
	199	Magnolol	0.104524	0.013297
	200	Artemisinin	0.328227	0.100382
	201	Salicoside	0.250984	-0.0463307
	202	Eugenol	-0.0172264	0.0269974
	203	Ferulaic Acid	-0.0235481	-0.0554799
	204	Emodin	0.0490025	-0.0237101
	205	Hyperoside	-0.00424297	0.0115472
	206	Icariine	-0.0901766	-0.129634
	207	Myricetin	0.0200389	0.0547453
	208	Resveratrol	0.0336471	-0.0132198
	209	Gracillin	-0.0531931	-0.154314
	210	Crocin Ii	0.0484634	-0.0198974
	211	Indigotin	-0.105284	0.00961697
	212	Picroside I	-0.0261028	-0.0564173
	213	Rutecarpine	-0.0254627	-0.0380433
	214	Wujingan	0.0871502	0.0323848
	215	Bullatine B	0.0659115	-0.0469495
	216	Qingyangshengenin A	0.0543577	0.0448996
	217	Salvianolic Acid A	0.0118992	0.071281
	218	Cinnamaldehyde	-0.083546	0.0683337
	219	Linarin	0.00777148	-0.0757992
	220	Cinnamic Acid	0.0720864	-0.0917898
	221	Scutellarin	0.0441258	-0.121928
	222	Atractylenolide Ⅲ	0.017626	0.0709503
	223	CPU-0811	-0.0319871	0.0770127
	224	Curculigoside	0.0400668	0.0104559
	225	Catalpa Acid	0.0249663	0.0237017
	226	Theophylline	0.0977658	0.048147
	227	Corynoline	-0.201217	-0.127676
	228	Anisic Acid	0.117814	0.0831565
	229	Artesunate	-0.241115	-0.026766
	230	Vincamine	0.0345644	0.104236
	231	Epicatechin Gallate	-0.0859146	-0.236056
	232	Procyanidin B2	-0.121809	0.09197
	233	Osthole	-0.0645265	0.0815046
	234	Sodium Danshensu	0.0345644	-0.0204412
	235	Borneol	-0.0465068	-0.030274
	236	Arctiin	-0.132145	-0.187179
	237	Salbutamol Sulfate	-0.0849777	-0.0861349
	238	Indirubin	-0.00679081	-0.0691016
	239	Crocin	0.0108882	-0.037407
	240	Neosperidin Dihydrochalcone	0.0209267	-0.0638586
	241	Wuweizi Ester B	0.0267251	-0.108075
	242	Schisanhenol	-0.0390712	-0.160769
	243	Aconitine	0.0782615	-0.148353
	244	Aconine	0.0705198	-0.103864
	245	Adenosine	-0.0239237	-0.0785219
	246	CPU-0833	-0.0437882	-0.00604035
	247	Mesaconitine	0.019172	-0.0215193
	248	γ-Aminobutyric Acid	0.0562273	-0.0944426
	249	（-）Epigallocatechin	-0.0526866	-0.0905459
	250	Sarsasapogenin	0.0364081	-0.0680479
	251	（-）Gallocatechin gallate	0.0197577	-0.120166
	252	Peimisine	-0.009913	-0.0359384
	253	Benzoylaconine	0.0403334	-0.0909155
	254	Benzoylhypaconine	0.00782534	-0.0130188
	255	Cyasterone	0.0455145	0.00994834
	256	Benzoylmesaconine	-0.144189	-0.041156
	257	CPU-0855	-0.0387283	-0.00796528
	258	Benzoylpaeoniflorin	-0.0282312	-0.0543708
	259	Bavachin	0.0642485	0.0703442
	260	Isobavachalcone	0.0547148	0.0114884
	261	Praeruptorin A	-0.0186155	-0.00436281
	262	Praeruptorin C	0.0018184	-0.010788
	263	Anemoside B4	0.0525675	-0.0463938
	264	Dictamine	0.0498683	-0.0577383
	265	Epimedin A	0.0658173	-0.0136292
	266	CPU-0867	-0.00488663	-0.0523628
	267	Aurantio-obtusin	0.036115	0.136667
	268	Echinocystic acid	0.0642485	-0.116536
	269	Crassicauline A	0.0791812	0.00451474
	270	Hypaconitine	0.0965454	0.0511306
	271	Acid Tartrate	-0.0481261	0.0715173
	272	Dipsacoside B	0.0827101	-0.00816629
	273	Cordycepin	-0.138743	0.00699767
	274	CPU-0876	-0.0909128	0.0608315
	275	Sodium Paeonol Sulfonate	0.0512084	0.0246125
	276	Liriope Muscari Baily Saponins C	-0.269867	0.0420335
	277	Syringic acid	-0.177099	-0.0270531
	278	Chrysin	-0.15	0.01
	279	Momordin Ic	-0.202814	0.028187
	280	Daidzein	-0.14997	-0.0789281
	281	Yunaconitine	-0.203617	-0.0536468
	282	Magnoflorine iodide	-0.0243206	0.122172
	283	Sweroside	0.0254103	0.0687776
	284	4-Hydroxybenzaldehyde	0.097413	0.0829034
	285	2,3,5,4'-Tetrahydroxy Stilbene 2-Ο-Β-D-Glucoside	-0.0323783	0.156797
	286	cis-Anethol	0.0605009	0.132825
	287	Lappaconitine	0.0273047	0.146851
	288	CPU-0894	0.0864176	0.0642771
	289	Glycyrrhizic acid	-0.0143243	0.141922
	290	Homoplantaginin	0.125442	0.0627143
	291	Mannose	0.0480662	0.0721609
	292	Puerarin	0.0380401	0.0163301
	293	Dehydrocostus Lactone	0.03	-0.02
	294	Costunolide	0.07	-0.04
	295	Liquiritigenin	0.142	0.037
	296	Cycloastragenol	0.136	-0.045
	297	Quercetin	0.086	-0.047
	298	Baicalin	0.053	-0.073
	299	Anisole	0.043	0.105
	300	Succinic acid	0.102	0.006
	301	Β-Hydroxyecdysone	0.056	-0.034
	302	Polydatin	0.288	0.036
	303	Phellodendrine	-0.099	0.199
	304	β-Sitosterol	0.098	0.038
	305	Nepetin-7-Glucoside	-0.07	-0.077
	306	Curcumin	-0.113	0.317
	307	Jiean Phenol	-0.0822337	-0.162789
	308	Geniposidic acid	-0.00169316	-0.0680457
	309	CPU-0923	-0.159701	-0.253442
	310	CPU-0924	0.0200074	-0.0237113
	311	Caffeic acid	0.0423646	0.0395159
	312	Ethyl Caffeate	0.0776765	0.0561518
	313	Secoisolariciresinol Diglycoside	0.0804936	0.00786453
	314	Forsythoside	0.0583959	0.0044151
	315	Roburic acid	0.127892	0.150292
	316	Magnoflorine hydrochloride	-0.0477978	-0.0605352
	317	Clopidogrel bisulfate	0.138205	0.13841
	318	Mogroside IV	0.170669	0.0765601
	319	LOUREIRIN B	0.098821	-0.033694
	320	Magnolin	-0.00542197	-0.0598555
	321	Morroniside	0.186386	0.0777985
	322	Toddaloactone	0.0598889	0.0247767
	323	α-Hederin	-0.192005	-0.0243366
	324	Loganin	0.191269	0.225795
	325	Gallic acid	-0.109761	0.0481178
	326	Methylparaben	0.0479075	0.0528585
	327	Ligustroflavone	0.0602759	0.105116
	328	Esculin Sesquihydrate	0.045973	0.0261201
	329	Artemisinic acid	0.116062	0.0135292
	330	Fisetin	-0.0214404	-0.222795
	331	Fraxin;Fraxoside; Paviin	0.0876064	0.0654797
	332	Fraxetin	0.271604	0.112885
	333	Ginsenoside Rg1	0.0737078	0.0990424
	334	Ginsenoside Rb1	0.216799	0.0708864
	335	CPU-0959	0.0330207	-0.0019676
	336	Ginsenoside Rd	0.0615338	0.0870709
	337	Ginsenoside Ro	0.299773	0.130358
	338	Genistein	-0.178609	-0.0971282
	339	Ginsenoside Rc	0.0964076	0.0540753
	340	CPU-0964	0.034569	0.0586731
	341	Ginsenoside Re	-0.017938	-0.152323
	342	Ginsenoside Rh1	0.250034	-0.0663292
	343	Paeoniflorin	0.213228	0.121545
	344	Notoginsenoside R1	0.0156149	-0.045491
	345	Carnosic acid	0.167357	0.106275
	346	Shanzhiside methylester	0.31381	0.192571
	347	Cyanidin3-o-glucoside	0.141562	-0.0349621
	348	Mulberroside A	0.233734	0.0490388
	349	Umbelliferone	0.26891	0.115401
	350	Agnuside	0.106346	-0.0620305
	351	Diosgenyl-3-di-β-o-glucopyranoside	0.203387	0.0317482
	352	Liriopesides B	0.0299074	0.0101329
	353	Cornuside I	0.060807	-0.0557851
	354	Silicristin	0.0680213	-0.0735036
	355	Songorine	0.115421	-0.0382846
	356	Narcissoside; Isorhamnetin-3-O-β-D-rutinoside	-0.0269277	0.054417
	357	L-rhamnose monohydrate	-0.0150535	0.0431535
	358	Huperzine-A	0.0390921	0.0590619
	359	Salicylic acid	0.0350967	0.0189872
	360	Eriocitrin	-0.0150535	0.00276382
	361	Kaempferitrin	0.0294407	0.0261658
	362	Silydianin	0.0807739	0.0497218
	363	Talatisamine	0.0585356	0.0603799
	364	Schisandrin C	0.0438385	-0.136605
	365	Isofraxidin	-0.152793	-0.0515938
	366	CPU-0997	0.00776317	0.0442931
	367	Acetylaconitine	-0.0666568	-0.0797361
	368	Oxypaeoniflorin	0.0237101	0.00873359
	369	Noricaritin	-0.127558	-0.111781
	370	Prunusetin	-0.160281	-0.0809492
	371	Myricetrin	-0.0586141	0.0716384
	372	D-Galactose	-0.059662	0.00385186
	373	Levamisole hydrochloride	-0.0158423	0.0656321
	374	3,4-Dihydroxybenzoic acid	-0.0329832	0.00743221
	375	Narirutin	-0.0530201	0.00885613
	376	1-[4-[[2-O-(6-Deoxy-L-Mannopyranosyl)-D-Glucopyranosyl]Oxy]-2,6-Dihydroxyphenyl]-3-(4-Hydroxyphenyl)-1-Propanone	-0.0118272	-0.0362963
	377	Tiliroside	-0.0226177	-0.0014533
	378	Linoleic Acid	-0.00260057	0.0447649
	379	Anemarsaponin E	-0.066407	0.0102754
	380	Taxifolin	-0.0701999	-0.13209
	381	CPU-1015	0.0598515	0.19794
	382	CPU-1016	-0.0260454	0.0156733
	383	Lithospermic acid	0.0324624	0.0720295
	384	Anemarsaponin BIII	0.0233446	0.0486736
	385	Catalpol	0.00258509	0.0212354
	386	Chikusetsusaponin V	0.0384363	0.0350596
	387	Isochlorogenic acid B	0.104874	0.141893
	388	Isochlorogenic acid A	0.0108819	0.0484574
	389	Isochlorogenic acid C	0.0227299	0.117685
	390	Citropten	0.0945702	0.137334
	391	6-Shogaol	-0.0794406	-0.0185255
	392	Raspberry Ketone	-0.0896899	-0.163095
	393	Chenodeoxycholic Acid	0.00711974	-0.124301
	394	Pachymic Acid	0.0590593	-0.117833
	395	Bergapten	0.124524	-0.153294
	396	Jateorrhizine	-0.18931	-0.216071
	397	Curcumol	0.162614	-0.0783734
	398	Oleanoside A	0.164428	-0.110911
	399	Plantamajoside	0.0167057	-0.159087
	400	Swertianolin	0.2008	0.00275743
	401	Rehmannioside D	-0.0161868	-0.164958
	402	Bilirubin	-0.0827779	-0.0873867
	403	Tanshinone Iia Sodium Sulfonate	0.126491	0.0248118
	404	Stigmasterol	-0.139563	-0.155419
	405	Farrerol	0.436964	-0.0045005
	406	Gaultherin	-0.122045	-0.056505
	407	Diosmin	-0.0408263	-0.157249
	408	Salvianolic Acid C	-0.0113465	-0.0345317
	409	Ciwujianoside B	-0.0356943	-0.0984554
	410	Deltaline	-0.262588	-0.125152
	411	Sennoside B	0.0300854	-0.161549
	412	Lycopene	0.0371862	-0.108993
	413	Apigenin-7-O-Glucronide	0.1613	-0.216071
	414	Indigo	-0.0903462	-0.1079
	415	Emodin-8-0-Β-Glucoside	0.0656499	-0.100864
	416	Emodin-1-O-Glucoside	-0.0672063	-0.161549
	417	Caftaric Acid	-0.083546	-0.0695434
	418	Scutellarin Methyl Ester	-0.0139709	-0.156028
	419	Helicide	0.0137883	0.0506681
	420	Eleutheroside D	-0.0848215	0.0454669
	421	3,6’-Disinapoyl Sucrose	-0.0204894	0.0928239
	422	Hypaphorine	-0.124272	0.0287997
	423	Bakkenolid	-0.0080801	-0.0371288
	424	Rehmannioside A	-0.0565647	0.0411946
	425	Scopoletin	-0.176592	-0.0238847
	426	Tuberostemonine	-0.0247059	0.232962
	427	Fumaric Acid	0.136297	0.0532455
	428	Columbianadin	-0.0376067	-0.0553028
	429	Falcarindiol	-0.129634	-0.109248
	430	Citric Acid	-0.108573	-0.0431027
	431	Pogostone	-0.0091008	-0.0825349
	432	Thermopsine	-0.2501	0.0072024
	433	Pulegone	-0.0588505	0.113999
	434	Α-Spinasterol-3-O -Β-D-Glucoside	-0.0257664	-0.209675
	435	13-Dehydroxyindaconintine	-0.0247059	0.0298179
	436	Ecliptasaponin A	-0.0321847	0.0791207
	437	Triptophenolide	0.0364523	-0.07384
	438	Hupehenine	-0.054291	0.00612962
	439	4-Methoxysalicylaldehyde	-0.0884865	0.00827253
	440	1,8-Dihydroxyanthraquinone	-0.106011	-0.286041
	441	Xanthohumol	0.048252	0.0812341
	442	Harpagide	-0.125606	0.0851318
	443	Hecogenin	0.0355312	0.076997
	444	Pinoresinol-Β-D-Glucoside	-0.104735	0.0742512
	445	Xanthotoxol	-0.0751969	0.063091
	446	1,3-Dicaffeoylquinic Acid	-0.0121773	0.081836
	447	Monoammonium Glycyrrhizinate	-0.006046	0.137377
	448	Manninotriose	0.0214751	0.035878
	449	Caffeine	0.0527063	0.102968
	450	R-Ginsenoside Rh2	-0.11115	-0.0661607
	451	R-Ginsenoside Rg3	-0.0173537	0.0760837
	452	R-Ginsenoside Rh1	0.056538	-0.0562363
	453	3-Hydroxymorindone	0.071567	-0.105146
	454	Β-Carotene	0.056538	0.0135381
	455	Glycerol Trioleate	0.018193	-0.00061617
	456	Polygalasaponin F	0.0399123	-0.0819816
	457	8-O-Acetyl Shanzhiside Methyl Ester	-0.108979	-0.0953223
	458	Juglone	-0.280616	0.0328
	459	Cyclovirobuxine D	0.0388517	-0.0229683
	460	Nardosinone	-0.0117702	-0.0297287
	461	R-Ginsenoside Rg2	-0.012965	-0.10698
	462	Sec-O-Glucosylhamaudol	-0.0801112	-0.132391
	463	Caudatin	-0.0375775	-0.0814861
	464	Wilforine	0.0270115	-0.121939
	465	Licochalcone A	0.0472645	-0.106455
	466	Diosbulbin B	0.0544943	-0.0687979
	467	1-Caffeoylquinic Acid	0.017078	-0.0476773
	468	Theobromine	0.141458	-0.0854659
	469	Sesamoside	-0.100115	-0.0395085
	470	Daucosterol	0.0626121	-0.00975517
	471	Β-Eudesmol	0.0575563	-0.0548368
	472	3-Hydroxy Puerarin	-0.111974	-0.186582
	473	Phloridzin	-0.00939052	-0.0904925
	474	5-Hydroxymethylfurfural	0.0125891	-0.213581
	475	Macranthoidin A	0.0324334	-0.155254
	476	6,17-Epoxylathyrol	0.0114596	-0.128511
	477	Scopolamine Butylbromide	0.0356544	-0.171701
	478	Xanthotoxin	-0.0663666	-0.261058
	479	Glabridin	-0.0636691	-0.0492837
	480	Denudatine	0.0616057	-0.0889784
	481	Engeletin	0.0203114	0.0258408
	482	Kurarinone	0.0157518	0.0107771
	483	Griffonilide	0.00765556	0.0785746
	484	1,2,3,4,6-Penta-O-Galloyl-Β-D-Glucopyranos	0.172712	-0.00867001
	485	Homoplantaginin	0.0270622	-0.0248493
	486	Forsythoside A	0.189161	0.0796659
	487	Benzoic Acid	0.13695	-0.0219319
	488	Licarin B	0.191843	0.0776022
	489	Arecoline	0.182968	0.0762616
	490	Lucidin	0.257642	0.133689
	491	Bavachinin	0.320206	0.245049
	492	Corylin	0.0520098	-0.0621479
	493	Epimedin A1	0.0660122	0.0948976
	494	Asperuloside	0.100342	0.0751617
	495	Catharanthine	0.0298444	0.0047749
	496	Toddalolactone	0.0180376	0.0484119
	497	Ganoderic Acid D	-0.240668	0.112879
	498	Verbenalin	0.178264	0.0793025
	499	Angoroside C	0.29984	0.0985075
	500	Kaempferol 3-O-Neohesperidoside	0.307224	0.0799081
	501	Anwuligan	0.0746752	0.0148719
	502	Atractylenolide Iii	0.054218	0.00443647
	503	Forsythoside B	0.0760054	0.0464736
	504	Sodium Ferulate	0.0132441	-0.0170525
	505	Brazilin	-0.00637508	-0.0322214
	506	Mandelic Acid	0.104905	0.0553963
	507	Allocryptopine	0.0400242	0.033695
	508	Fraxinol	0.0871502	0.0137933
	509	Anemoside A3	0.0290658	0.0687857
	510	Praeruptorin E	-0.0529361	-0.0864076
	511	Eucalyptol	0.0216035	0.0691933
	512	Praeruptorin B	0.0576952	-0.0992254
	513	Piceatannol	0.0922974	0.0759309
	514	Forsythoside E	0.0385789	-0.0417591
	515	Byakangelicin	-0.0476072	0.0235565
	516	Baimaside	0.113517	0.0573545
	517	Solasonine	0.0163025	-0.0009566
	518	Ophiopogonin D	-0.0693265	-0.0762291
	519	Irisflorentin	0.0726724	-0.0524085
	520	Gypenoside Xvii	0.00706185	0.05216
	521	Theaflavin	0.0414646	0.0294001
	522	Pinocembrin	0.0890876	0.123263
	523	Loganic Acid	0.134909	0.0620736
	524	Saikosaponin B2	0.122559	0.0488994
	525	Rosiridin	0.10366	0.0960492
	526	Ganoderic Acid B	0.0793131	0.0834863
	527	Notopterol	0.150849	0.0642767
	528	Ganoderic Acid A	0.159153	0.0922024
	529	Hydroxytyrosol	0.228443	0.0570753
	530	Atractylodin	0.113992	0.0140454
	531	Liquidambaric Acid	0.0486727	-0.0686864
	532	Ergosterol	0.14147	0.00511392
	533	Rosavin	0.148303	0.0495348
	534	Cyanidin Chloride	0.00943472	-0.0641906
	535	Ganoderic Acid G	0.105597	0.0550078
	536	Madecassoside	0.190065	0.0946148
	537	Calceolarioside B	0.193337	-0.0241961
	538	Ruscogenin	0.180939	-0.0126572
	539	Proplygallate	0.0830848	0.0706968
	540	Kirenol	0.0441011	-0.12148
	541	Atractylenolide Ii	0.118372	-0.0767446
	542	Melittoside	0.0960189	-0.134079
	543	Purpurin	0.0724528	-0.0313249
	544	Pectolinarigenin	-0.022176	-0.014914
	545	Taurohyodeoxycholic Acid	0.132659	0.0396707
	546	Rhodojaponin Ii	-0.00063633	-0.0127896
	547	Gallic Acid Ethyl Ester	0.00693877	0.0180116
	548	Raffinose	-0.00511693	-0.132506
	549	Astragaloside Ii	0.0565589	-0.104467
	550	Gomisin J	0.153246	-0.0302205
	551	N-Methylcytisine	0.117887	-0.0615152
	552	Pedunculoside	0.237461	0.0473493
	553	Cytisine	0.26353	0.00701622
	554	Geraniin	0.0593411	-0.0851116
	555	Acacetin	0.0793931	-0.203426
	556	Tyrosol	0.305773	0.116891
	557	Gypenoside A	0.261794	0.147522
	558	Zingerone	0.256542	0.275404
	559	Gypenoside	0.114969	0.0642007
	560	Sciadopitysin	0.233765	0.0651979
	561	Poliumoside	0.0718334	0.0190366
	562	Chicoric Acid	0.107389	0.0110843
	563	Genipin 1-Gentiobioside	0.0277599	0.0417158
	564	Tigogenin	0.0468312	0.0195735
	565	Obacunone	0.048116	-0.0356674
	566	Methyleugenol	0.161022	0.140288
	567	Rosarin	0.117894	0.0800847
	568	Rhodojaponin Iii	0.048116	0.0170621
	569	Oroxin B	0.124939	0.0825673
	570	Sinapine Thiocyanate	0.0896837	0.0389876
	571	Ganoderenic Acid B	0.0209845	0.00056098
	572	Platycodin D2	-0.252273	-0.00926681
	573	Ginsenoside Rg5	0.0506745	0.0582258
	574	Ginsenoside Rb2	0.0960492	0.0156205
	575	Pseudoginsenoside F11	0.0920092	0.0109018
	576	Notoginsenoside Fe	0.111289	0.0461129
	577	Ginsenoside Rk3	0.0532179	0.00093457
	578	Specnuezhenide	0.0832234	0.00631577
	579	Albiflorin	0.152531	0.0445958
	580	Palmitic Acid	0.0657165	0.051298
	581	Camphor	-0.0168041	-0.059894
	582	Cornuside	0.161516	0.0360699
	583	Oxypeucedanin Hydrate	0.00710809	-0.0248346
	584	Jaceosidin	-0.104866	-0.0280162
	585	Endothall Disodium Salt	0.142839	0.12973
	586	Coniferin	0.0766657	0.020467
	587	Rubusoside	0.0778654	0.0725507
	588	Tetrahydroberberine	0.102889	-0.00056171
	589	Aucubin	0.12116	0.0296513
	590	L-Carnitine	0.0663321	-0.0644281
	591	Tangeretin	-0.0673955	-0.13031
	592	Isorhamnetin-3-O-Nehesperidine	-0.0648887	-0.0390201
	593	Neohesperidin	-0.110299	-0.0783424
	594	5-Caffeoylquinic Acid	-0.0364696	-0.0761133
	595	Dipsacoside B	-0.0750038	-0.0239738
	596	Phillyrin	-0.053784	-0.0633337
	597	Punicalagin	-0.253661	-0.0664029
	598	Matrine	-0.0370553	-0.00124574
	599	Oxymatrine	-0.0642643	0.0707288
	600	Amphicoside Ii	-0.0260599	0.0243396
	601	Limonin	-0.00924644	0.0392245
	602	Isovitexin	0.0478513	0.040926
	603	Fuziline	0.0271196	0.0176728
	604	Orcinol Glucoside	-0.0840519	0.0228669
	605	Astragalin	0.0111568	-0.067673
	606	Gypsogenin-3-O-Glucuronide	0.132541	0.031918
	607	Melatonin	0.226985	0.0863012
	608	Sesamolin	0.219583	0.101088
	609	Dendrobine	0.272391	0.164696
	610	Desoxyrhaponticin	0.245415	0.16074
	611	Apiin	0.320756	0.141864
	612	Stevioside	0.295887	0.149205
	613	Pterostilbene	0.241729	0.127265
	614	Sesamol	0.233635	0.110593
	615	Dehydroandrographolide	0.116379	0.0149772
	616	Rotundic Acid	0.0235661	-0.0307636
	617	Rhapontin	0.0931265	0.134055
	618	Phytolaccagenin	0.0240755	0.027416
	619	Dehydrodiisoeugenol	-0.0825194	-0.00267
	620	Scopolamine Hydrobromide	-0.0274527	0.0389661
	621	Eriodictyol	0.0226753	-0.00549836
	622	Strychnine	-0.0183389	0.104465
	623	Lithospermoside	0.0424193	0.0837106
	624	Arecoline Hydrobromide	0.064756	0.0326448
	625	Imperatorin	-0.0605649	-0.054881
	626	Heterophyllin B	0.0454248	0.0424104
	627	1-Deoxynojirimycin	0.0442251	0.0354943
	628	Tenacissoside H	0.023306	-0.0162719
	629	Levistilide A	0.0314239	-0.106113
	630	Norisoboldine	-0.0980755	-0.131906
	631	Usnic Acid	0.00790846	0.00928637
	632	Esculentoside A	0.0226753	0.0425374
	633	Corynoxeine	-0.139135	-0.123447
	634	Methyl Palmitate	0.0601481	0.0450705
	635	Swertiamarin	-0.0353167	-0.0365168
	636	Solanesol	-0.0544907	-0.0479422
	637	3-Acetyl-11-Keto-Beta-Boswellic Acid	-0.0514852	-0.178973
	638	Isoacteoside	0.0169566	-0.111875
	639	Nodakenin	0.0111616	-0.09691
	640	Senegenin	-0.0310096	-0.0513978
	641	Schizandrol A	-0.0107738	-0.0742223
	642	Isoferulic Acid	0.0607268	-0.100603
	643	Brassinolide	-0.0729741	-0.121775
	644	Isorhamnetin 3-O-Neohesperoside	-0.0274527	-0.0528194
	645	Isoorientin	0.00986328	-0.0953368
	646	Isorhamnetin-3-O-Glucoside	-0.00602731	-0.0722324
	647	Vaccarin	-0.0859594	-0.0315329
	648	Linderane	0.0606667	-0.0244551
	649	Isoliquiritin	-0.059733	-0.0606333
	650	Schisandrin A	-0.0756185	-0.120537
	651	Schizandrol B	-0.13182	-0.0318788
	652	Oxy-Resveratrol	-0.164136	0.00144404
	653	Methyl Stearate	-0.0897588	-0.0143369
	654	Tectorigenin	-0.128998	-0.065653
	655	Tetrahydrocoptisine	-0.0746075	-0.0635549
	656	Isocurcumenol	-0.239189	-0.115991
	657	Naringin	-0.0145506	-0.126909
	658	Lupeol	0.0600441	0.00110461
	659	Isodemethylwedelolacton	0.0907129	-0.0117712
	660	Monocrotaline	0.0383248	-0.0165322
	661	Isobergapten	-0.0630294	-0.0954838
	662	Naringenin	-0.0250341	-0.175723
	663	Isoschaftoside	0.0575445	-0.0803626
	664	Protodioscin	-0.0420371	-0.00724925
	665	Delsoline	0.0486811	-0.0325251
	666	Stachydrine Hydrochloride	0.120444	-0.0485107
	667	Leonurine	0.015462	-0.0419645
	668	Isoquercitrin	0.0777479	-0.042574
	669	Skimmianine	0.00427178	-0.0606333
	670	Indaconitine	0.111681	0.0185832
	671	Scutellarein	-0.0250341	-0.103363
	672	Jatrorrhizine	0.0283863	-0.00724925
	673	Icarrin	0.0409371	-0.036918
	674	Isoimperatorin	0.0229913	-0.0421676
	675	Ginkgolide J	0.0759496	0.0205217
	676	Isorhynchophylline	-0.0739187	-0.10783
	677	Procyanidins	0.122607	0.0386019
	678	Oxypeucedanin	0.00779978	0.0688911
	679	New Isobavachin	-0.119488	-0.281565
	680	3,29-Dibenzoyl Rarounitriol	0.103302	-0.00463301
	681	Cardamonin	-0.195478	0.233453
	682	Ursodeoxycholic Acid	-0.100162	-0.0447141
	683	Neoline	-0.186027	-0.0435133
	684	Tenuifolin	-0.118439	-0.135801
	685	Abrine	-0.209758	-0.158637
	686	Vanillin	-0.154484	-0.132109
	687	Asarinin	-0.222825	-0.271332
	688	Schaftoside	-0.139244	-0.0885386
	689	Corydaline	-0.191189	-0.19645
	690	Tenuifolin A	-0.130125	-0.03422
	691	Herba Siegesbeckiae Glycoside	-0.228447	-0.0115428
	692	Leonurin Monohydrochloride	-0.225627	0.0352347
	693	Berberrabine	-0.314185	0.0286836
	694	Carvacrol	-0.17276	-0.132109
	695	2-Acetylacteoside	-0.163526	-0.00932037
	696	Complanatoside	-0.0657641	-0.0413204
	697	Oroxylin A-7-O-Β-D-Glucuronide	-0.157477	-0.0643929
	698	Sanggenon D	-0.175882	-0.0218769
	699	Diterpenoid	-0.245028	-0.0683957
	700	Kaempferide	-0.167196	-0.0947907
	701	Malic Acid	-0.140976	-0.069031
	702	Silymarin Ⅱ	-0.126754	-0.123855
	703	Alpinetin	-0.153293	-0.0589746
	704	Iso-Silybin	-0.241369	-0.13828
	705	Perillaldehyde	-0.104393	0.0128267
	706	Kaempferol-3-O-Rutinoside	-0.077993	0.0148753
	707	Oroxylin-A	0.0535069	-0.220469
	708	Morusin	-0.298488	0.0647795
	709	Maslinic Acid	-0.0914206	-0.0568385
	710	Morin	0.0350889	0.0611933
	711	Kuwanon G	0.129168	0.0108503
	712	Silydianin	0.0711756	-0.0806348
	713	Taraxerol Acetate	-0.275452	-0.00816092
	714	Ellagic Acid	-0.174395	-0.0512044
	715	Alanine	-0.140219	0.113065
	716	Sibiricose A6	-0.095637	-0.0331585
	717	Psoralidin	-0.0998949	0.30965
	718	Secoxyloganin	-0.189907	0.0168738
	719	Columbin	-0.0271797	-0.00145353
	720	Menthol	-0.0344789	0.0620926
	721	Garlicin	-0.0428399	-0.0894596
	722	Chasmanine	-0.00255719	0.0232082
