# Supplementary material for: A high-throughput small molecule screen identifies farrerol as a potentiator of CRISPR/Cas9-mediated genome editing
Source: eLife. 2020 Jul 9;9:e56008. doi: 10.7554/eLife.56008 (PMC7380943; doi:10.7554/eLife.56008)
Supplement: Figure 1—source data 2. [file elife-56008-fig1-data2.xlsx]

## Sheet: Fig.1E
	Figure 1E. Flow cytometry analysis of tdTomato+ and GFP+ cells upon doxycycline addition
	GFP+ (%)	-Dox	+Dox		tdTomato+ (%)	-Dox	+Dox
		0.005	1.5			0.134	4.04
		0.005	1.54			0.098	4.29
		0.015	1.36			0.108	4.24
	Average	0.00833333	1.46667		Average	0.113333	4.19
	s.d.	0.0057735	0.0945163		s.d.	0.0185831	0.132288

## Sheet: Figure 1 - figure supplement 1A
	Figure 1-figure supplement 1A. Analysis of NHEJ and HR efficiency in human fibroblast.
	HR efficiency (GFP+/DsRed+)							NHEJ efficiency (GFP+/DsRed+)
		Farrerol							Farrerol
	0	0.1 μM	1 μM	5 μM	10 μM			0	0.1 μM	1 μM	5 μM	10 μM
	0.107767	0.235529	0.263485	0.204515	0.317391			0.544762	0.641026	0.530648	0.634578	0.600382
	0.128926	0.189433	0.261438	0.329687	0.353579			0.592369	0.707434	0.517544	0.600382	0.581633
	0.112057	0.196172	0.15885	0.241135	0.312821			0.609312	0.663158	0.551383	0.504532	0.548295
	0.0993827				0.297468
	0.111976
	0.13985

## Sheet: Figure 1 - figure supplement 1B
	Figure 1-figure supplement 1B. Analysis of NHEJ and HR efficiency in mouse ESCs.
	HR efficiency (GFP+/DsRed+)
		Farrerol
	0	0.1 μM	1 μM	5 μM	10 μM
	1.5443	1.88419	1.93381	2.52038	3.17544
	1.52899	1.66478	2.25833	2.36667	3.287
	1.5	1.8825	2.13008	2.39785	3.09402

## Sheet: Figure 1 - figure supplement 2B
	Figure 1-figure supplement 2B. Analysis of cell cycle distribution in HCA2-hTERT cells treated with farrerol at indicated concentrations.
					Farrerol
	%	0			0.1 μM			1 μM			5 μM			10 μM
	G1	75.8	77	74	76.8	74.8	74.9	76.1	74	74.2	72.6	72.2	71.4	72.1	73	72.7
	S	9.87	9.05	10.2	9.08	9.35	10	9.91	9.84	10.7	11	10.5	11.1	10.9	10.2	11
	G2-M	13.8	13.4	15.3	13.8	15.5	14.7	13.7	15.8	14.7	16	16.8	16.8	16.5	16.4	15.7

## Sheet: Figure 1 - figure supplement 2D
	Figure 1-figure supplement 2D. The number of RPA2 foci per nucleus in HCA2-hTERT cells post 2 Gy X-Ray treatment.
	Time post IR	0 h			4 h			8 h			16 h			24 h
	Farrerol	0	1 μM	5 μM	0	1 μM	5 μM	0	1 μM	5 μM	0	1 μM	5 μM	0	1 μM	5 μM
		1	3	4	7	8	6	17	1	13	7	5	8	11	11	20
		1	1	0	26	7	8	16	11	8	2	1	3	6	1	3
		1	4	1	5	6	18	18	6	21	14	6	7	7	2	1
		1	2	0	5	12	3	10	16	4	1	3	9	1	7	1
		1	4	3	25	16	7	20	12	14	10	1	6	2	13	6
		1	1	8	10	14	2	21	1	3	12	1	0	2	1	1
		1	6	6	9	13	4	6	2	15	2	0	1	1	1	1
		2	0	4	6	15	21	4	2	8	13	1	1	14	1	1
		2	11	4	3	13	13	14	8	9	1	1	1	3	1	1
		3	17	3	3	11	20	2	15	4	0	1	19	2	4	4
		1	4	1	24	20	18	12	12	13	1	11	1	3	2	7
		1	3	6	11	5	16	0	2	4	1	14	4	1	4	1
		2	6	3	4	11	16	14	20	39	1	12	2	12	10	1
		1	15	6	1	3	17	13	1	7	3	1	3	1	1	1
		1	0	8	1	12	24	10	11	16	12	3	3	17	1	0
		2	0	0	1	16	9	2	1	3	15	16	0	1	1	1
		2	0	7	0	11	6	13	1	15	4	5	1	0	1	16
		3	5	5	29	7	7	16	6	8	0	14	1	0	14	1
		0	9	4	19	6	24	0	8	7	0	0	1	2	9	16
		0	4	4	25	19	15	15	6	12	22	0	2	2	12	18
		1	7	3	20	3	0	8	15	9	1	0	12	3	9	17
		1	5	5	21	11	17	14	10	9	5	1	7	2	5	0
		15	0	8	10	6	18	14	2	10	1	1	2	3	3	0
		1	0	6	24	1	23	9	16	7	1	1	0	6	9	1
		4	0	4	8	33	5	1	5	11	2	1	0	1	0	1
		0	10	4	16	11	5	4	25	8	4	1	0	2	0	1
		0	10	6	19	0	11	3	2	5	10	5	1	2	5	1
		0	7	0	6	12	5	6	5	14	12	9	1	0	1	1
		3	7	3	19	8	8	8	13	11	1	11	14	0	5	12
		2	5	8	16	3	21	2	12	4	2	1	2	0	13	0
		1	4	3	9	24	13	4	7	16	1	2	1	1	0	9
		0	1	5	1	2	18	4	8	17	14	5	1	1	0	1
		0	2	8	8	2	0	16	9	12	13	6	9	1	0	2
		0	1	4	4	13	10	1	6	11	1	8	3	1	0	2
		0	3	2	4	1	18	1	4	12	1	5	13	1	2	8
		0	12	7	4	8	13	0	12	4	1	1	2	1	5	5
		0	2	3	2	1	11	4	10	8	2	9	5	1	1	0
		0	1	1	6	11	6	15	12	26	1	0	1	6	1	0
		6	2	1	7	5	13	9	13	8	3	1	1	0	0	0
		2	1	5	2	11	17	7	7	6	1	19	2	0	9	9
		1	1	6	3	10	5	12	3	7	1	11	12	0	6	2
		1	1	2	1	13	9	4	14	6	10	2	11	3	12	1
		6	2	4	14	12	27	7	2	3	1	2	6	13	10	1
		10	1	3	19	0	12	12	5	4	1	2	1	1	17	0
		1	0	0	17	25	9	10	4	6	16	10	1	17	1	0
		0	13	0	16	3	6	2	7	15	1	11	1	13	1	0
		0	2	3	14	12	19	12	11	21	3	1	3	1	0	1
		9	2	1	11	1	10	2	12	16	1	0	10	1	1	1
		1	1	1	25	1	5	19	11	5	1	0	2	0	6	5
		2	2	0	8	3	10	15	10	4	1	8	2	0	2	2
		1	4	4	11	7	7	1	1	5	1	2	2	2	1	11
		1	1	2	11	9	10	11	8	3	14	2	8	5	15	1
		2	6	7	18	7	15	14	6	5	1	1	1	1	0	0
		2	6	1	26	1	6	4	1	22	11	1	2	2	1	0
		2	1	0	5	11	10	0	6	14	1	0	1	1	1	1
		9	1	1	1	1	14	11	12	9	1	5	10	2	4	1
		1	4	1	1	6	21	7	12	12	1	8	1	1	1	2
		1	1	2	1	4	7	4	21	12	1	12	6	1	12	11
		2	11	14	1	0	14	6	19	6	0	9	13	0	1	1
		0	3	1	0	0	15	6	10	13	9	12	1	0	0	1
		4	1	11	7	11	11	4	7	1	9	2	16	0	0	1
		2	1	4	3	1	3	0	7	1	1	5	2	1	0	1
		1	1	4	24	12	9	0	9	9	1	0	10	1	2	1
		1	3	1	6	22	3	1	1	10	5	0	2	2	2	0
		18	1	1	4	12	1	9	2	8	11	1	1	16	1	3
		1	0	6	2	9	2	8	11	28	1	5	12	1	0	2
		1	1	3	18	11	4	12	13	4	1	8	2	2	0	1
		2	1	1	22	13	0	6	14	10	1	7	4	1	0	11
		6	2	12	25	7	6	1	7	1	1	8	5	1	1	1
		2	10	0	11	6		7	17	2	1	10	1	4	1	3
		10	1	0	9	0		8	0	14	2	1	1	0	12	10
		5	1	0	28	1		0	6	7	3	1	6	1	10	13
		1	2	0	8	5		4	16	3	1	1	1	1	14	8
		5	1	2	4	2		9	3	5	21	1	2	1	2	2
		7	1	3	1	5		8	6	7	1	11	9	2	0	1
		2	2	9	1	2		6	10	1	1	1	1	2	0	1
		0	2	6	4	11		7	6	13	1	1	1	12	1	13
		0	2	8	1	8		6	12	8	1	1	1	1	1	1
		11	2	3	1	18		10	4	8	13	19	8	2	0	1
		6	0	0	3	8		31	22	14	0	1	2	0	2	0
		11	7	0	2	2		3	25	12	1	1	10	9	2	1
		1	15	0	5	0		4	6	14	2	12	1	2	1	1
		1	2	0	1	10		2	15	2	24	7	8	1	1	1
		10	2	2	1	2		14	10	15	3	0	1	1	0	6
		4	1	0	3	7		7			11		14	3	0	4
		1	1	0	4	12		1			19		7	2		8
		1	4		10	17		2			23		14	1		9
		2	1		2	14		1			3		2	0		1
		1	1		2	9		1			2		11	1		1
		1	0		12	11		0			0		1	2		1
		1	1		1	3					16		12	1		9
		1	1		5	7					2		1	5		7
		1	1		7	12					2		2	2		5
		2	1		12	8					1		5	16		8
		1	2		15	13					1		5	7		1
		0	1		15	13					20		15			10
		0	1		11	8					12		3			1
		0	0		11	21					14		18			2
		0	3		5	22					1		12			1
		0	2		9	5					17		9			2
		0	1		1	16					1		1			7
			0		0	2					1		1			2
			0		9	41					10		1			0
					1	13					3		9			0
					8	14					0		5			0
					1	8							1
					1	4							7
					16	12							4
					17	14							1
					7	19							1
					2	1							12
					38	4							9
					19	8							9
					9	1							15
					12	19							0
					0	10							0
					8	8							0
					4	12							0
					2	11							0
					4	11
					3

## Sheet: Figure 1 - figure supplement 2F
	Figure 1-figure supplement 2F. The number of RAD51 foci per nucleus in HCA2-hTERT cells post 2 Gy X-Ray treatment.
	Time post IR	0 h			4 h			8 h			16 h			24 h
	Farrerol	0	1 μM	5 μM	0	1 μM	5 μM	0	1 μM	5 μM	0	1 μM	5 μM	0	1 μM	5 μM
		0	1	0	10	3	3	7	0	0	3	3	0	8	11	11
		0	0	2	11	4	5	1	4	5	9	14	13	1	0	3
		0	0	2	0	5	8	3	10	7	13	11	9	1	0	0
		0	0	0	0	7	7	1	6	11	20	7	5	23	0	0
		1	0	0	0	10	5	2	4	9	1	3	9	0	0	0
		2	0	1	11	2	2	4	0	3	6	1	3	0	0	0
		2	2	6	12	12	0	5	4	5	0	0	0	0	0	0
		0	0	0	5	6	0	0	0	14	2	0	0	3	0	0
		0	0	0	0	0	12	2	8	11	4	0	0	0	0	0
		0	0	0	5	3	2	0	1	7	13	0	0	0	0	0
		0	1	0	0	8	6	1	3	4	17	0	11	2	10	0
		0	0	0	0	8	1	8	2	2	16	0	14	0	0	16
		0	0	0	13	10	5	3	0	14	25	0	7	0	0	0
		0	0	5	9	5	9	1	9	6	0	5	0	1	0	0
		0	0	0	0	10	7	5	9	0	4	17	0	0	0	3
		0	0	9	0	6	9	9	0	12	4	14	6	0	0	0
		2	0	0	9	8	4	7	0	1	0	0	0	0	1	0
		3	0	0	13	8	5	1	8	0	14	0	0	0	0	0
		2	0	0	6	3	6	3	13	0	34	0	7	0	0	0
		0	0	0	11	2	7	10	1	17	8	0	12	12	0	0
		0	0	0	8	4	6	11	11	2	4	3	7	5	0	0
		0	0	0	11	0	7	6	0	6	11	3	7	0	0	0
		0	6	1	0	10	0	8	0	1	0	0	0	0	0	0
		0	2	1	2	8	8	8	6	0	0	7	0	0	0	0
		2	1	0	7	11	7	3	8	5	12	14	0	0	0	0
		0	6	1	5	0	5	8	1	6	0	7	0	1	0	0
		0	1	0	14	8	8	3	0	8	1	0	11	1	0	6
		3	3	0	3	6	8	18	2	7	8	0	5	4	0	1
		1	1	0	0	8	10	11	1	1	1	0	2	0	0	0
		0	0	0	0	4	6	0	0	2	6	0	0	0	2	0
		0	0	0	0	10	9	8	0	0	0	0	0	0	0	0
		0	0	0	6	0	10	13	11	3	5	7	0	0	0	0
		4	0	3	8	0	7	12	6	5	5	4	0	0	0	0
		3	0	4	3	0	0	0	2	1	0	3	11	6	0	0
		7	2	1	0	2	0	0	13	3	10	0	5	2	0	0
		0	0	1	0	12	4	33	18	5	12	0	11	0	0	0
		0	0	6	10	6	1	0	0	8	3	0	11	0	13	0
		0	0	6	12	9	2	3	0	3	14	0	13	7	1	0
		0	3	6	0	6	1	1	9	11	3	0	1	0	4	0
		0	9	0	7	14	6	9	11	3	0	13	0	0	0	2
		0	2	0	0	12	3	10	2	8	0	8	0	16	4	10
		0	1	1	0	8	14	2	2	1	16	1	0	3	0	0
		3	2	5	0	12	1	2	0	6	14	1	0	0	0	0
		4	3	1	0	9	1	10	15	9	2	0	0	6	0	8
		0	0	4	6	16	1	6	11	6	14	0	0	1	14	0
		3	0	4	8	4	8	14	4	9	0	0	0	0	1	0
		0	1	2	4	3	6	2	8	10	14	0	9	0	0	2
		0	2	8	5	4	10	0	1	7	15	0	9	0	0	0
		1	0	0	14	0	4	2	2	8	15	0	0	3	0	0
		0	2	8	2	8	0	0	6	9	16	8	11	0	2	0
		0	0	0	10	7	6	5	3	1	0	11	10	0	4	0
		0	10	0	2	4	5	7	11	0	2	4	0	1	0	0
		2	0	0	0	13	9	0	9	2	0	10	0	0	0	0
		0	0	0	0	13	0	8	2	8	11	4	12	0	0	0
		0	0	0	0	11	5	2	2	7	15	28	9	5	0	0
		0	0	0	0	9	6	1	0	3	12	0	0	3	3	4
		0	3	0	0	0	10	0	0	4	1	0	12	1	0	0
		0	2		4	12	12	13	2	2	0	0	0	0	0	0
		0	0		7	12	0	8	4	5	0	0	0	0	0	0
		0	0		3	10	2	1		16	0	0	12	0	0	0
		7	10		4	5	6	8		6	2	0	8	0	0	0
		3	1		8	1	9	8		3	4	6	0	0	0	0
		0	2		2	0	0	0		4	8	1	0	0	0	0
		0	0		0	0	5	0		9	13	9	0	0	0	0
		0	0		0	10	5	5		8	14	0	0	4	0	0
		0	2		0	8	9	3		0	0	0	0	0	2	2
		0	1		1	8	9	0		12	0	0	4	0	0	0
		0	2		8	9	7	8		0	0	0	11	0	0	9
		2	0		7	10	8	4		12	3	9	2	0	0	10
		0	0		6	1	3	0		1	12	0	12	5	0	11
		4	0		4	1	1	0		8	5	0	3	0	10	1
		3	0		10	0	7	6		0	16	0	0	0	0	0
		2	0		8	5	6	8		5	8	0	0	0	0	0
		0	2		0	10	7	10		7	4	14	2	0	0	0
		2	0		10	0	11	7		2	0	0	14	0	0	0
		0	0		7	11	10	7		11	0	0	0	4	0	0
		0	0		9	10	9	2		7	0	0	3	0	0	0
		0	0		10	11	5	2		1	0	13	0	0	0	0
		0	0		4	1	9	15		11	0	11	2	0	0	0
		0	0		1	2	6	7		3	0	14	0		0	0
		0	1		2	9	3	0		11	10	1	6		0	0
		0	0		7	13	15	0		3	10	0	16		0	0
		2	0		0	3	6	0		6	7	0	0		0	0
		0	0		0	0	8	4		0	17	0	0		0	0
		0	0		0	7	7	9		2	16	0	0		9	0
		4	0		0	11	10	10		12	1	0	16		0	0
		3	0		0	8	10	0		1	0	14	18		0	0
		2	0		0	18	6	0		8	0	0	0		0	0
		0	0		0	8	7	0		1	0	0	1		0	12
		0	0		0	3	1	2		0	0	0	3		2	1
		0	0		1	4	1	12		10	0	0	10		0	0
		0	0		8	5	8	8		4	20	0	1		0	0
		0			3	12	14	4		0	21	14	10		0	0
		0			11	0	6	1		2	18	2	0		0	0
					6	7	12	11		14	0	0	9		0	0
					3	11	9	0			4	0	0		0	0
					6	7	8	8			0	0	0		0	0
					0	6	7	1			0	1	6		0	5
					3		12	8			8	0	0		5	0
					3		11	9			2	12	5		1	0
					4		0				16	4	0		0	0
					13		5				14	0	13		0	0
							10				1	8	11		0	12
							6				14	8	9		16	2
							10				13	13	4		0	0
							13				14	3	0		0	0
							3				13	0	0		0	0
											0	0	0		3	0
											0	0	9		5	13
											0	6	12		0	16
											1	9	0		0	1
											1	0	0		0	0
											8	0	0		3	12
											12	0	0		0	0
											5	0	0		0	0
											9	0	11		0	0
											0	12	2		0	0
											6	9	14		7	0
											21	0	10		1	5
											4	0	8		0	0
											16	0	18		0	0
											2	0	0		13	0
											6	0	0		0	0
											8	0	0		0	0
											1		0		0	0
											2		0		0	0
											0				0	12
											0				3	1
											0				2	0
											0				0	0
											0				0	0
											0				0	0
															0	0
															11	0
															5	0
															1	0
															0	0
															0	0
															0	0
															4	0
															1	0
															1	0
															0	0
															0	0
															1	0
															0	16
															0	7
															0	0
															0	1
															1	16
															0
															0
															0
															10
															1
															1
															14
															0
															0
															0
															0
															0
															0
															0
															0
															0
															0
															0
															0
															5
															14
															14
															1
															2
															0
															0
															0
															0
															0

## Sheet: Figure 1 - figure supplement 3C
	Figure 1-figure supplement 3C. Analysis of SSA efficiency upon small molecule treatment.
	SSA efficiency (GFP+/DsRed+)
		Farrerol			RS-1
	0	1 μM	5 μM	10 μM	10 μM
	0.209404	0.123916	0.0459705	0.102709	0.182757
	0.181578	0.150015	0.0691148	0.0730159	0.20184
	0.179332	0.137553	0.0553202	0.122847	0.186983
