# Supplementary material for: A high-throughput small molecule screen identifies farrerol as a potentiator of CRISPR/Cas9-mediated genome editing
Source: eLife. 2020 Jul 9;9:e56008. doi: 10.7554/eLife.56008 (PMC7380943; doi:10.7554/eLife.56008)
Supplement: Figure 2—source data 1. [file elife-56008-fig2-data1.xlsx]

## Sheet: Fig.2D-E
	Figure 2D-E. Influence of small molecules on gene knock-in frequency at human AAVS1 locus.
	Chemical compounds	Concentration (μM)	No. of KI	No. of cell colonies	KI percentage (%)	Significance (𝛘2-test)
	DMSO	0	20	81	24.6914
	Farrerol	0.1	12	48	25	n.s.
		1	33	76	43.4211	*
		5	29	62	46.7742	**
		10	20	55	36.3636	n.s.
	SCR7	0.1	8	32	25	n.s.
		1	12	28	42.8571	n.s.
	RS-1	10	11	24	45.8333	*
	KI: knock-in; n.s.: not significant

## Sheet: Fig.2F
	Figure 2F. The cell number of HEK 293FT upon farrerol treatment.
	Cell number (×105)
	Farrerol	0	0.1 μM	1 μM	5 μM	10 μM
	24 h	0.769	0.61	0.838	0.55	0.64
		0.602	0.563	0.984	0.43	0.455
		0.571	0.649	0.57	0.602	0.692
	48 h	1.58	1.75	0.93	0.67	0.82
		1.61	1.65	1.25	0.77	1.12
		1.36	1.89	0.95	0.95	0.55
	72 h	5.76	6.8	7.2	6.53	6.17
		6.46	7.09	7.02	6.06	6.09
		5.68	6.27	6.96	6.96	6.1
	96 h	13.3	14.4	13.5	14.4	15.7
		14.1	14.2	13.5	14.8	15.1
		13.2	13.5	13.8	16	13

## Sheet: Figure 2 - figure supplement 1C
	Figure 2-figure supplement 1C. The percentage of successfully targeted HEK 293FT cells at the AAVS1 locus.
	%	Farrerol				SCR7		RS-1
	0	0.1 µM	1 µM	5 µM	10 µM	0.1 µM	1 µM	10 µM
	0.541941	0.920039	0.746744	1.02507	1.01036	0.53774	0.662722	0.98
	0.5787	0.92634	0.836017	0.996709	1.06393	0.404355	0.597605	0.82
	0.613359	0.805559	0.763548	0.945245	0.942094	0.46212	0.61756	0.95
	0.47	0.92	1.02	0.85	0.77	0.85	0.79
	0.68	0.76	1.11	1.05	0.8	0.76	0.71
	0.7	0.77		1.17	1.17	0.98	0.98
	0.5	0.79		1.03		0.74	0.86
	0.54
