# Supplementary material for: A high-throughput small molecule screen identifies farrerol as a potentiator of CRISPR/Cas9-mediated genome editing
Source: eLife. 2020 Jul 9;9:e56008. doi: 10.7554/eLife.56008 (PMC7380943; doi:10.7554/eLife.56008)
Supplement: Figure 3—source data 1. [file elife-56008-fig3-data1.xlsx]

## Sheet: Fig.3D
	Figure 3D. The number of successfully targeted mouse ESC colonies at the Actb locus.
		Farrerol					SCR7		RS-1
	Only Donor	0	0.1 μM	1 μM	5 μM	10 μM	0.1 μM	1 μM	1 μM	10 μM
	0	24	50	56	54	80.5	27.769	46.0443	40.1108	36.0759
	0	26.5	44	58.5	52.5	74.5	31.5665	30.6171	40.5854	46.2816
	0	24.5	45	56.5	54.5	97.5	34.8892	40.3481	36.0759	40.5854
		25	36.25	27.5	60	53.75	31.875	44.375
		30	38.75	41.875	58.125	63.75	32.5	37.5
		20	29.375	35	51.875	54.375	36.25	44.375

## Sheet: Figure 3 - figure supplement 1C
	Figure 3-figure supplement 1C. The percentage of successfully targeted mouse ESCs at the Rosa26 locus.
		Farrerol				SCR7		RS-1
	0	0.1 μM	1 μM	5 μM	10 μM	0.1 μM	1 μM	10 μM
	0.366	0.598	0.565	0.979	0.968	0.851	0.901	0.786
	0.327	0.636	0.776	0.938	0.944	0.94	0.841	0.916
	0.322	0.554	0.673	1	0.897	0.958	1.07	0.893

## Sheet: Figure 3 - figure supplement 2C
	Figure 3-figure supplement 2C. The percentage of successfully targeted mouse ESCs at the Sox2 locus.
	%	Farrerol				SCR7		RS-1
	0	0.1 μM	1 μM	5 μM	10 μM	0.1 μM	1 μM	10 μM
	2.78	4.44	4.38	5.41	5.74	5.63142	4.2445	5.50061
	2.75	4.43	5.34	4.92	4.53	5.4052	6.9967	4.72486
	2.59	4.09	4.89	4.6	4.4	3.37553	3.9798	4.21741
	2.6398	4.47723	4.38897	6.37083	5.88138	3.72887	7.02	4.26156
	2.91261	4.26862	4.13221	6.05791	5.753	4.06	4.3767	4.39113
	2.56759	4.06	4.83028	5.54439	5.63265	3.94482	4.2184	4.0456
	2.50511						7.05
	2.76426						5.94
	2.85064						4.2328
