# Supplementary material for: A high-throughput small molecule screen identifies farrerol as a potentiator of CRISPR/Cas9-mediated genome editing
Source: eLife. 2020 Jul 9;9:e56008. doi: 10.7554/eLife.56008 (PMC7380943; doi:10.7554/eLife.56008)
Supplement: Figure 4—source data 1. [file elife-56008-fig4-data1.xlsx]

## Sheet: Fig.4B
		gamma H2AX intensity in mouse ESCs
			Farrerol				SCR7		RS-1
		0	0.1 μM	1 μM	5 μM	10 μM	0.1 μM	1 μM	1 μM	10 μM
		0.823983	0.916246	1.07131	0.895183	0.559007	1.34327	1.18876	0.69723	0.522659
		0.822371	1.20521	1.01318	1.21699	0.783036	1.1837	1.47628	1.10693	1.37859
		0.652332	0.499316	1.67682	1.50846	1.12851	1.84707	1.74035	1.39964	1.18586
		0.729075	0.567784	1.8206	1.23493	0.973607	1.56974	1.20385	0.573239	1.28033
		0.761923	0.949586	1.15493	1.07801	0.883084	0.969705	1.75199	0.794585	0.963906
		0.834126	1.0087	0.76902	1.23541	0.955345	1.45035	2.39044	0.442043	1.31919
		1.13387	1.09222	0.859209	0.858236	0.871161	1.3855	1.21665	0.697633	1.47219
		0.992046	1.56095	0.869775	0.839778	0.794938	1.51257	1.20567	0.98724	0.556942
		0.818616	0.779605	0.727876	0.922183	0.679951	1.26901	1.39463	0.964732	1.30372
		0.704808	0.75865	1.10075	1.0896	0.555321	1.57954	1.10849	1.02439	1.34742
		0.692915	0.427084	1.48516	0.897375	0.786407	1.68969	0.943246	0.94245	1.189
		0.951984	1.15402	1.88671	0.899567	0.64493	1.36251	1.18224	0.848899	0.651073
		0.88386	1.2087	1.0749	0.962491	0.652558	1.49595	1.21409	0.771349	1.49629
		0.548558	0.522768	1.55344	0.429118	0.597487	1.35606	1.02584	0.666062	1.68625
		0.508024	0.927648	1.27592	0.537727	0.440952	2.00527	0.883221	0.691352	1.05365
		1.06748	1.26978	0.73226	0.683253	0.344452	1.42333	1.20565	0.971416	1.40567
		0.918762	1.11799	1.60311	0.654209	0.639485	1.35116	0.922241	0.500377	1.01724
		0.858079	1.16951	1.39526	0.680078	0.519003	1.6922	1.31654	1.01955	0.672392
		1.39248	0.821811	1.51229	0.737892	0.515632	1.34479	2.06563	1.39908	0.837753
		1.08662	0.974187	1.08207	0.887595	1.10691	1.01722	1.39023	0.65986	0.841439
		1.35194	0.673139	1.09621	0.640213	1.52673	0.933516	0.765983	1.07712	0.57545
		1.1036	0.929486	0.907056	0.569366	1.34355	1.51041	1.33245	1.02374	1.29302
		0.58467	0.707825	0.944907	0.825831	1.0812	0.541639	1.45478	0.902545	1.21233
		1.12767	1.04291	1.14484	0.738098	1.08533	0.520133	0.899385	0.807116	1.097
		0.802929	0.579116	1.18772	0.462507	1.02795	0.502756	1.43684	0.490411	1.34798
		1.26889	0.848407	0.999792	0.600101	1.16035	0.490834	0.922668	0.573514	0.875093
		0.977185	1.05546	0.728741	0.689465	1.21609	0.473142	1.03093	0.591481	0.543732
		1.17027	1.08258	0.467166	0.746964	1.30116	1.19035	0.673435	0.543968	1.54546
		1.6653	1.01639	0.483432	0.612692	1.63109	1.14737	0.525401	0.598568	2.00845
		0.46805	1.12747	1.08901	0.886455	1.13394	0.571273	0.5063	0.861755	2.0241
		1.1998	1.71707	1.27684	1.15698	1.3178	0.544548	0.932851	0.533245	1.40894
		1.15015	1.2472	1.84896	0.648498	0.831993	1.02922	1.51899	0.747937	1.67662
		0.910192	1.41861	1.24075	1.16044	1.10198	1.01389	0.950937	0.588002	1.6094
		1.20129	1.32903	1.51468	1.26772	1.3045	1.05584	0.526469	0.462222	1.65723
		1.2096	1.47518	0.96024	0.536567	0.407966	0.944809	0.708538	0.513145	0.786554
		1.26176	1.1909	1.15358	0.890721	1.54203	1.22332	0.55358	0.656361	0.63691
		1.07147	1.06346	0.735209	0.870414	0.944406	0.940759	0.859528	0.430376	0.778711
		1.04174	0.960545	1.01561	1.36885	1.15348	0.840692	0.769952	0.79199	1.28635
		1.19622	1.33586	1.46124	1.05916	1.55993	0.775959	0.71865	0.70241	1.4305
		1.14811	0.872351	1.10238	0.832848	1.4708	0.618314	0.771501	1.20374	1.99887
		1.27614	1.06656	1.02848	1.22502	1.01117	0.859239	0.727337	1.21993	1.48232
		1.2851	0.964457	1.11602	1.17013	1.56964	0.9413	0.842919	1.08723	1.60557
		1.03431	1.23036	0.488858	1.20398	0.749637	0.696611	1.17847	1.09772	1.16542
		1.04897	0.593811	0.605241	0.617911	1.60422	0.749411	0.735614	1.45167	1.7298
		1.12533	1.16767	0.711079	0.906702	1.2767	0.5496	1.63783	1.03818	1.05979
		1.15412	0.505675	0.473604	1.13864	0.546062	0.445788	1.63624	1.19259	1.06847
		0.9654	0.798025	0.534493	0.492927	1.35011	0.565041	1.74428	1.08844	1.73931
		0.586016	0.741853	0.669149	0.59958	0.981353	0.665601	1.32147	1.24893	1.27889
		0.995899	0.463106	0.73396	0.965725	0.7328	1.04605	1.44632	0.973942	1.57477
		0.886308	0.779959	0.566211	0.866325	0.820091	0.995575	1.74793	0.910781	1.46365
		1.17453	1.26217	1.0971	0.591275	0.754444	0.541295	1.78663	0.999565	1.47737
		0.953665	0.712337	0.401912	0.532862	0.841223	0.361476	1.48488	1.58622	1.23153
		1.10441	0.827413	0.944465	0.531918	0.817771	0.673631	2.21784	1.9564	0.90225
		1.52971	1.08019	0.703314	0.512781	0.828868	0.350664	1.33224	1.42897	1.76192
		1.66628	1.03994	0.434622	0.722372	0.771752	1.08865	1.28638	1.35581	1.42975
		1.51128	0.526955	1.13085	0.704474	0.666908	0.987397	1.15481	0.853381	0.40375
		1.69499	0.673601	0.810606	0.911627	0.948986	1.32354	1.72507	1.20327	0.800796
		0.840417	0.784323	1.4396	0.494588	0.763909	0.942647	1.85347	1.28792	0.798949
		1.22461	1.09553	0.596376	0.811942	1.09336	1.15618	1.9222	0.744585	1.12238
		0.884666	0.922478	1.3876	0.340157	0.824071	1.10794	1.84818	0.746374	0.868409
		0.709762	0.912049	1.49884	0.481074	1.19803	1.63635	1.48191	1.00616	1.09129
		0.809308	1.167	0.775753	0.908953	0.751957	1.38637	1.80562	0.953075	1.19575
		0.999418	1.22935	1.06346	0.60361	0.818449	1.64432	1.69349	1.07623	0.888411
		0.865746	0.987958	1.27061	0.466831	0.835247	1.50949	1.47397	1.00055	1.66611
		1.47405	1.48134	1.00703	0.691637	0.781787	1.50185	1.42023	0.812139	1.88964
		1.35981	0.782908	0.811028	0.643977	0.888499	1.10765	0.906434	1.06504	1.21815
		1.28333	1.09961	0.721999	0.78221	0.849695	1.52175	1.08106	1.09406	1.23575
		1.56837	1.07554	1.61411	1.20128	1.12065	1.14745	1.15415	0.795577	1.10373
		1.48472	1.42836	0.824828	1.85252	1.37577	1.58407	0.890359	0.778416	1.55648
		1.31972	1.09195	0.424155	0.808522	1.47511	1.22733	0.7877	0.662111	1.4032
		1.86305	1.64337	0.757618	0.804492	1.47063	1.10839	0.990455	0.928346	1.88291
		1.69943	0.836062	1.08089	1.66328	1.31291	1.0341	1.17132	0.769659	1.56003
		1.10172	0.432283	0.93268	1.30034	1.02739	1.38769	1.01401	0.785041	0.471343
		1.50306	0.747554	0.974698	0.961243	0.800049	1.29492	0.856217	0.934567	0.792324
		1.22787	0.877068	1.00076	0.735454	1.44348	1.0448	0.953411	0.603109	1.13668
		0.658317	0.715885	0.789945	0.61051	1.10488	1.24971	0.635803	1.21737	1.05127
		0.754856	0.819403	1.08841	0.983063	1.10334	0.937644	0.593917	0.932798	0.943973
		0.814911	0.638856	1.22553	0.676078	0.96827	0.98267	0.828411	0.806065	0.981235
		1.0151	0.701997	0.805996	1.03491	1.0018	1.15058	0.79377	0.775477	1.24537
		0.72251	0.664136	0.965214	1.16291	1.5272	0.662259	0.738587	0.749893	1.23423
		1.07252	0.63807	0.583087	1.09507	0.687253	1.10916	0.695134	0.65643	0.889207
		1.27137	0.623828	0.653236	1.15078	0.803362	1.35417	1.94169	1.24794	1.43493
		1.14826	0.918762	0.599531	1.14507	0.939727	0.789651	0.807815	0.663939	1.27573
		1.08464	1.32907	1.71671	0.893473	1.17293	0.749352	1.61004	0.738187	1.09867
		1.33331	1.00919	0.664195	0.889305	1.26955	0.681798	0.714787	0.672962	0.863102
		1.15516	0.768715	0.890141	1.0453	1.27426	0.697417	1.21954	0.877629	1.78729
		0.829988	0.696129	0.868999	1.04235	0.915116	0.499542	0.865224	0.699431	1.11713
		1.15651	0.524183	0.419142	0.967209	0.512005	0.761609	1.55482	1.37983	1.10423
		1.00987	0.805485	0.62655	0.843906	1.16904	1.38268	0.908303	1.08697	0.793582
		0.850992	0.747986	0.463234	1.05201	1.21191	1.03437	1.0511	1.58117	1.29664
		0.92925	0.61334	1.14222	1.33534	0.869933	0.774583	0.738017	1.44725	1.23752
		0.800167	0.99068	0.780392	1.71208	0.617439	1.19217	1.10759	1.26608	1.53937
		0.806369	1.04919	0.514629	1.04591	0.428027	0.959454	0.927368	1.39222	0.801013
		0.971514	0.99359	0.639475	1.61971	0.668933	0.892981	0.942766	1.56867	1.57101
		1.07635	0.617105	0.53007	0.395287	0.566624	0.363235	1.15875	1.19463	0.994563
		0.742423	0.696856	0.764007	1.22184	0.554289	0.344275	0.754483	1.05968	0.976851
		1.07309	0.917072	0.826528	0.679685	0.84137	0.402561	0.842563	2.11954	1.55895
		1.07539	0.818538	1.20301	1.11789	0.794978	0.448235	0.932619	1.32767	1.08725
		0.812601	0.779478	1.19803	0.920787	0.640507	0.361496	1.17046	1.02776	0.923067
		0.791125	0.94188	0.984852	0.923814	0.437374	1.6022	1.03619	0.809259	1.47382
		0.868507	1.27225	0.892431	1.11863	0.959877	0.71387	0.928009	1.2628	1.64517
		0.67251	0.771133	0.758837	1.78707	1.02251	0.699726	0.843685	0.956486	1.42614
		0.682408	0.931147	1.07073	1.23968	0.961282	1.06726	0.945756	0.8052	0.920286
		0.642188	0.814498	1.57294	0.768686	0.891989	0.908137	1.06939	1.05303	1.26835
		0.943914	0.994779	1.49045	0.445945	1.08897	0.74545	0.665656	0.478774	1.08695
		0.819127	0.954058	1.02146	0.496583	0.823	0.607119	0.755177	0.971376	1.12551
		0.395297	1.5619	1.45098	0.742973	0.753146	0.708435	1.06235	1.44421	0.922655
		0.741332	1.26971	0.876882	0.861961	0.631622	0.733262	0.685041	1.35452	0.927628
		1.12247	1.68652	0.472758	0.780176	0.996813	0.625302	0.777927	1.10055	0.761668
		0.907096	1.22366	0.851464	0.686654	0.342388	0.438691	0.988461	1.21702	0.94072
		0.753274	1.33928	0.753942	0.820287	0.488445	0.734137	0.676034	1.10689	1.21401
		0.878385	1.43867	0.901277	0.576453	0.658937	0.704759	0.750923	0.595845	0.554603
		0.762031	1.34743	0.776391	0.663556	0.451734	0.798811	1.28255	1.08179	0.620732
		0.982149	1.19345	0.922773	0.576964	0.465396	1.11868	0.948124	0.562358	0.683804
		0.575234	0.987732	0.815756	1.17077	0.644429	1.06725	0.877471	1.47692	0.987132
		0.6679	1.12111	1.1966	1.50732	0.672373	0.476995	0.799129	0.691047	0.67368
		0.526394	0.641628	1.19895	1.18414	0.280663	1.15137	0.876759	1.00067	0.828858
		0.536567	0.619434	1.255	1.07908	0.397538	0.898102	0.968186	0.77588	0.590331
		0.560717	1.00241	0.485113	1.14527	0.434878	1.50204	0.713452	1.25144	0.912354
		1.26372	1.08097	1.03172	1.93808	0.323448	0.753726	0.945329	1.64138	0.602971
		1.45039	1.00669	1.34397	0.931992	0.586773	0.986287	1.02887	0.751672	1.41136
		1.26051	0.917563	1.16514	0.783134	0.396712	0.951306	0.999196	0.748448	1.3888
		1.58963	0.959041	1.07025	1.43752	1.22654	1.16835	1.40814	0.796885	1.15254
		1.32096	0.819304	0.567931	1.6519	1.45467	1.05451	0.827432	0.873648	0.862178
		1.15833	0.66849	1.07548	0.991928	1.24766	0.954579	1.01632	0.815137	1.84376
		0.725458	0.641402	0.843346	1.48524	1.07159	0.689298	0.919073	0.675921	1.30551
		0.994189	1.33541	1.04142	0.985785	0.906447	0.614156	0.823658	0.672451	1.38046
		0.845439	0.985766	0.910319	1.04803	1.08861	0.560569	0.783072	0.688816	1.60521
		0.982149	0.692679	0.716602	0.81666	0.98092	0.850108	1.34215	0.884312	1.62061
		0.829821	0.962884	0.713841	0.845587	0.945222	0.765875	1.14084	1.02274	1.76198
		0.472965	1.03474	0.492278	0.854944	1.08588	1.07203	1.01586	0.580414	1.06624
		0.426828	1.13202	0.817761	1.06708	0.970678	1.13885	0.951738	1.0904	1.30613
		0.792265	0.874287	0.880695	0.364513	0.724269	1.09451	1.21625	1.27367	1.62004
		0.960722	1.55455	0.75521	0.931786	1.34615	1.26068	0.801104	0.904933	1.32366
		1.10489	0.831502	0.801465	0.69034	0.730677	1.14903	1.01944	0.710695	1.62958
		0.907833	0.92926	0.512713	0.528262	1.34437	1.03671	1.1133	1.83853	1.1416
		0.918959	0.990739	0.760302	0.880037	0.919539	0.794909	1.12948	0.437522	0.986051
		0.678181	0.947777	0.480435	0.941516	1.5275	1.18795	0.503879	0.370332	0.86319
		0.451626	1.19571	0.36412	0.76615	1.7647	0.764715	0.909976	0.510118	0.813495
		0.661207	1.63515	0.64495	0.799597	0.873923	1.36457	0.545356	0.569828	1.04475
		0.914575	1.28167	0.840141	1.04754	0.795568	0.603433	0.871846	0.416144	0.749215
		0.761756	1.23673	1.27619	0.595747	0.891232	0.702184	0.929646	0.79887	1.15107
		0.862571	1.1903	0.98669	0.99473	1.1481	0.688335	0.651575	0.945703	1.45753
		0.596337	0.74661	1.25198	0.561631	1.23561	0.564029	0.646608	1.53013	1.35381
		0.724564	0.836416	0.594577	0.799715	1.26172	0.982129	0.580495	1.30724	1.35231
		0.613164	1.16034	1.26365	0.782662	1.25003	0.825172	0.515111	1.91131	1.57527
		0.535948	1.11026	0.598774	0.982149	1.19223	0.693721	0.726019	1.14206	0.949989
		0.75696	1.51873	1.38388	0.788343	1.04754	0.889482	0.780686	1.40323	1.54765
		0.816159	0.514678	0.629234	0.476424	0.436342	1.09414	0.776539	0.969116	1.37879
		0.579264	0.648577	0.72251	0.606657	1.10799	1.81743	1.04475	1.20553	0.678024
		0.407583	0.771634	1.44475	0.565395	1.64497	1.29215	0.720839	1.16239	1.46222
		0.370587	0.770337	0.725429	0.47497	0.896323	1.01605	0.718881	1.58472	1.48224
		0.533432	0.558525	0.778338	0.463971	0.650179	1.57018	0.920087	1.63377	0.611257
		1.51064	0.651752	0.738609	0.942666	0.87815	1.16587	1.01232	1.16819	1.22724
		1.0606	0.525274	0.729498	0.62253	0.817201	0.736191	0.99471	1.11622	0.973883
		1.49356	1.52702	0.671547	0.521726	0.569907	1.22347	0.959677	1.46235	0.744595
		1.1815	1.07439	0.836849	0.390904	0.674623	1.16038	0.840783	0.70123	0.89649
		1.1854	0.794978	0.788333	0.493615	0.533049	0.81667	0.918325	0.94472	1.01019
		1.49507	0.805495	0.560157	0.833212	0.309648	0.73856	0.889558	0.634522	1.65296
		1.1398	0.718165	1.11006	1.17605	0.784087	1.04568	0.714449	0.835964	0.628438
		1.46276	1.27799	1.42726	0.64326	0.83795	0.89537	0.628451	0.952751	0.95109
		1.30761	1.25286	1.20761	0.512487	0.544145	1.1323	0.958057	0.818901	1.19324
		1.31918	1.24838	1.26773	0.782181	0.547556	1.26203	0.75742	0.974571	1.18833
		1.66052	0.809092	1.12156	0.764499	0.760891	0.823894	0.635091	0.350654	1.29893
		1.4869	0.870739	1.13618	0.573239	0.630403	1.6262	1.45076	0.422032	1.8637
		1.32111	0.658769	0.959631	0.34916	0.650975	0.527456	1.97692	0.758169	1.61506
		1.3469	0.641746	0.933378	0.396054	0.863691	0.887743	1.33407	1.06432	1.31336
		1.24192	0.410689	0.842373	0.712209	0.795047	1.34601	0.836974	0.408635	0.628585
		0.968093	0.505449	0.544293	0.639475	0.682182	0.669503	1.05506	0.685642	1.09421
		0.873736	0.547104	0.548814	0.676973	0.631091	0.999241	1.37101	1.13878	1.1871
		0.844093	0.402167	0.742079	0.936091	0.616771	0.838431	1.32501	1.29862	1.48249
		0.593054	0.391198	0.633421	1.09974	1.06567	0.583215	1.08909	1.3949	1.20785
		0.831295	0.661512	0.241161	0.945389	1.15406	0.494873	1.08562	1.04449	1.06446
		1.17192	1.39537	0.803165	0.894279	1.02333	0.956987	1.43087	0.493212	0.598902
		1.47513	0.672982	0.562604	0.823943	1.00881	1.05297	1.25548	0.649688	0.857509
		1.18501	0.432951	0.332088	1.4705	0.507818	0.775969	1.12491	0.865244	1.07619
		1.22176	0.493399	0.365103	1.4552	0.681238	0.775939	0.68529	1.04124	1.27631
		1.15132	1.02662	0.649678	1.10404	0.833468	1.16521	0.802991	0.464492	1.16869
		0.903793	0.538926	0.555036	0.912944	1.06512	1.06144	1.19317	1.5726	1.21489
			0.612672	0.479639	1.22893	0.562732	0.852034	1.06972	1.67235	1.63479
			0.736054	0.463008	0.967396	0.458172	1.0914	1.12384	1.369	1.07066
			0.452816	0.598253	1.74116	0.640969	1.40269	0.773673	1.24808	0.580286
			0.854285	0.838313	1.71018	0.643132	0.873884	1.3714	1.35997	0.626747
			0.566241	1.10638	1.46596	0.787193	0.799332	0.661134	1.7231	1.13751
			0.625027	0.792688	1.31441	1.20183	0.690576	0.417259	0.816906	0.558623
			0.538956	1.12403	0.943482	1.10829	0.76213	0.563744	0.922488	0.923903
			0.716013	1.16515	1.51776	0.747308	0.888195	0.800642	1.27128	0.744566
			0.600553	0.81034	1.85896	1.04541	0.812512	1.0252	1.32233	0.809505
			0.509184	0.613901	1.53931		0.723473	1.00863	0.788795	0.706469
			0.562162	0.814468			0.641048	1.37542	1.37589	0.626875
			0.53929	1.16931			1.01607	1.3424	1.27339	1.0292
			0.459873	0.951896			1.34527	0.950296	1.06386	0.821781
			0.4968	0.721576			1.1196	1.24284	1.35463	0.861529
				0.558476			1.40559	0.885589	1.26043	0.812552
				0.603394			0.757481	1.05897	0.712995	0.907734
							0.632448		1.47819	0.749608
							1.05246		1.57779	0.651162
							0.682221		1.749	0.725655
							0.680078		1.09553	0.602873
							0.872056		1.18322	0.490725
							1.11748		1.66747	0.368946
							0.565857		0.728613	0.885226
							0.900825		1.00065	0.490834
							0.398187		0.383768	1.03785
							1.12856		1.45958	0.901562
							1.06891		0.360817	0.764037
							1.21212		0.601104	0.535742
							1.13378		1.04294	0.486814
							0.71157		1.14047	0.639957
							1.20132		0.827128	0.67595
							0.596435		0.870935	0.746472
							0.860192		0.988931	0.945625
							0.832878		0.951119	0.840417
							0.789297		1.02098	0.431428
							1.06982		0.893945	0.77247
							0.47496		0.707904	0.956889
							0.507739		0.464659	0.682359
							0.574172		0.570388	0.639505
							0.398678		0.54961	0.576502
							0.943295		0.32103	0.981402
							0.498903

## Sheet: Fig.4D
		Figure 4D. The number of 53BP1 foci per nucleus in mouse ESCs treated with indicated compounds.
			Farrerol				SCR7		RS-1
		0	0.1 μM	1 μM	5 μM	10 μM	0.1 μM	1 μM	1 μM	10 μM
		2	4	8	5	7	5	6	5	4
		3	8	10	4	1	4	16	6	1
		2	4	4	5	1	12	11	5	7
		3	3	3	9	4	6	3	12	6
		2	1	3	4	4	6	5	7	8
		4	8	1	4	6	3	4	8	1
		3	6	2	8	2	3	7	2	2
		4	7	3	5	11	1	8	8	2
		5	5	2	12	5	1	4	9	1
		3	1	5	9	6	5	5	3	1
		3	8	5	9	7	1	5	4	3
		3	4	10	4	8	4	7	3	4
		2	5	11	3	1	4	3	5	4
		2	2	7	8	1	11	1	4	2
		8	13	4	7	1	3	2	6	1
		8	6	4	7	5	4	7	4	5
		7	7	6	4	2	5	12	1	4
		4	7	5	7	2	2	9	1	1
		5	5	3	14	1	7	6	2	2
		5	2	4	5	2	2	8	11	4
		6	6	2	2	7	6	9	3	8
		6	6	12	2	4	9	11	3	1
		2	7	4	9	3	8	7	2	2
		2	6	4	2	2	11	12	4	5
		6	4	1	7	1	3	10	8	3
		5	4	1	8	1	4	6	1	2
		8	5	2	3	1	1	3	4	7
		7	5	2	3	4	6	5	5	11
		5	3	1	4	2	14	4	7	2
		5	2	2	3	4	1	7	6	3
		2	2	1	1	2	8	4	3	1
		7	3	2	9	5	5	1	1	3
		3	2	3	3	1	3	1	4	4
		12	7	1	3	4	5	5	3	2
		8	6	4	4	4	6	12	2	9
		10	3	5	6	1	7	5	5	4
		12	10	3	4	1	4	5	6	3
		10	4	3	5	2	5	7	2	7
		7	7	4	3	7	2	3	2	1
		3	6	2	6	4	1	6	5	3
		10	2	3	2	5	4	10	8	13
		1	12	4	4	4	1	9	4	6
		3	5	12	1	2	1	15	2	5
		2	6	6	1	1	1	7	3	3
		7	10	8	1	4	2	1	4	3
		1	5	8	2	3	1	9	2	7
		2	3	2	1	4	1	3	13	7
		1	1	2	2	3	1	3	1	10
		3	3	5	2	5	6	1	2	12
		4	1	3	6	1	2	4	3	10
		2	3	6	8	1	4	2	4	1
		4	3	8	3	3	6	2	3	1
		5	4	2	5	2	1	1	2	9
		4	1	4	5	7	1	1	8	2
		4	12	3	5	2	1	4	2	1
		2	4	1	1	2	2	5	4	14
		1	3	2	3	6	1	9	1	10
		1	6	1	5	5	8	3	4	7
		9	3	1	4	9	1	1	6	3
		2	13	5	7	6	3	7	2	3
		2	1	2	5	5	5	4	3	2
		1	4	2	4	1	12	7	1	3
		1	10	1	2	1	2	1	6	5
		4	14	3	4	1	3	2	4	4
		4	6	1	2	2	8	4	8	1
		1	4	1	2	1	1	2	3	1
		6	6	9	3	6	4	4	6	5
		1	13	12	6	7	6	5	4	1
		3	3	8	2	6	7	7	4	1
		3	6	7	2	1	1	4	3	1
		7	6	2	6	1	2	1	4	4
		8	9	8	7	2	5	2	10	9
		1	4	3	8	2	1	3	3	5
		2	7	4	7	1	1	1	8	2
		7	2	13	3	2	2	3	5	4
		6	4	9	5	3	4	2	4	1
		4	1	6	1	2	7	1	9	1
		5	3	6	1	1	5	4	6	1
		11	3	5	2	1	5	1	3	1
		8	2	9	1	1	6	1	1	1
		6	1	5	2	1	5	1	2	1
		6	1	6	4	1	2	4	8	1
		13	1	8	3	2	1	1	2	2
		5	1	12	2	4	3	2	1	1
		6	1	3	7	3	1	1	1	2
		9	2	7	4	1	2	1	3	13
		8	1	4	13	1	6	1	4	1
		4	6	4	1	1	5	5	1	4
		4	5	2	3	2	2	3	3	6
		3	1	4	1	4	3	2	7	3
			3	2	5		2	1	5	5

## Sheet: Fig.4E
		Figure 4E. The tail moment in mouse ESCs treated with indicated compounds.
			Farrerol				SCR7		RS-1
		0	0.1 μM	1 μM	5 μM	10 μM	0.1 μM	1 μM	1 μM	10 μM
		11.5027	20.4142	34.1631	2.78366	0.333667	101.823	0.124576	0.216055	19.7621
		0.176618	2.57601	61.0984	19.7497	0.0688399	31.8324	7.07573	7.4561	44.7761
		0.54783	12.7296	51.7817	47.2568	28.2926	0.569166	34.3623	10.8806	13.5039
		6.66895	37.7478	13.3319	10.1198	15.0325	21.7681	48.4582	16.0167	39.0239
		46.3811	94.5513	5.54248	6.23436	37.9595	34.4541	42.4928	26.8691	0.645429
		1.36827	32.1823	26.761	1.99083	0.846127	16.7869	50.331	54.668	4.59656
		53.0488	6.95881	29.3175	25.5308	2.30047	26.1196	10.6773	0.273317	3.87092
		39.8569	9.08759	62.0452	6.22397	0.8454	44.4453	5.09462	51.8069	22.3953
		1.8945	8.51045	2.14952	25.4966	63.3237	51.3436	24.6773	9.87091	20.3272
		1.51538	34.0267	45.6424	42.3478	0.0811997	0.316177	0.98944	7.51487	0.898983
		2.09703	51.09	44.7039	0.189678	33.4258	0.175813	4.84673	4.3892	1.30062
		41.6776	4.47747	1.69204	7.46143	45.6734	36.5379	43.1591	11.6033	0.493661
		2.7094	52.4451	0.0207593	12.063	3.57449	21.1928	38.2687	0.33228	0.346364
		10.169	1.23459	5.76899	26.4115	18.905	0.577949	30.4504	65.3228	0.110079
		12.0195	8.1234	0.0277619	26.2752	15.5072	11.1962	47.7015	21.4656	14.6587
		27.7415	3.55318	0.0870376	20.487	52.1892	1.09127	21.1019	4.88133	0.341563
		0.362011	22.7347	82.0637	14.2014	0.648547	24.0666	0.00931169	51.1417	33.886
		29.4916	15.8738	5.09947	18.6859	37.1967	0.729053	23.0846	30.5855	0.031493
		29.4708	14.9471	28.5539	21.0416	3.44413	1.01749	41.6494	17.5779	34.3088
		6.31687	53.3668	20.5575	19.6755	33.0214	54.3606	6.69851	18.5289	0.18755
		0.130699	35.4987	2.12715	20.9361	0.117676	6.19463	4.93873	57.4572	0.12629
		20.2532	4.1661	1.00098	29.1065	22.7756	26.2288	81.0014	6.13812	24.7728
		36.9103	22.121	28.034	12.4469	6.58679	3.71817	66.0711	44.1666	2.28127
		26.6388	32.9978	11.4368	31.3466	35.4059	32.3495	0.0285471	9.67298	0.937955
		23.439	32.652	41.9678	9.37436	32.8131	29.4965	17.3141	8.55213	0.216627
		14.5968	33.1846	5.07946	64.4221	12.2474	56.9166	76.3474	0.438296	14.1085
		5.20961	6.77366	0.238421	0.455234	0.298797	7.68506	64.5679	13.3125	51.5256
		1.05551	20.1188	1.11133	30.4661	63.3112	37.2493	33.3186	28.2385	50.8333
		0.242344	29.7339	23.7138	45.7436	11.289	1.70733	78.3841	15.4362	85.3497
		1.60003	20.1075	9.25088	75.109	26.2516	32.5428	14.1019	0.0202362	2.49173
		31.3573	17.7408	27.2545	4.79232	11.0498	46.693	9.09447	27.3708	40.3215
		38.7646	7.11598	14.5791	1.8742	13.5547	36.2637	25.0445	22.7373	0.052343
		0.148387	0.179951	26.2392	25.0979	42.2964	22.574	6.17983	0.0698072	1.59165
		35.8174	4.41769	60.5752	36.7623	33.7679	3.39802	43.2307	0.314612	35.0531
		70.8011	0.284869	10.5256	11.1951	26.7083	37.2347	44.6655	34.1207	4.62354
		10.8438	10.8406	54.7084	45.293	0.453304	31.857	9.89753	45.7962	10.321
		1.5343	6.15962	9.6773	35.4202	34.526	39.2923	51.9088	59.1108	6.50615
		13.8186	1.23637	0.310808	7.36867	18.0606	84.8452	14.628	18.0256	58.951
		19.2434	0.344572	40.0138	20.1297	2.70299	67.3126	23.9437	41.0263	82.8995
		83.6624	0.557759	30.9891	36.4006	9.38182	0.468356	0.166563	17.2771	23.4086
		3.42389	1.80827	1.7021	25.6407	21.7864	21.9351	41.0376	37.0052	21.139
		97.3854	18.0469	4.65677	30.6797	77.7383	9.62964	95.3291	39.3444	31.6727
		1.91414	0.245732	52.7399	55.0785	51.6572	17.607	43.9618	31.7056	3.50874
		85.9027	63.4247	0.447955	49.2277	14.9025	67.8754	24.9302	41.6555	20.1997
		45.6879	17.2726	24.4847	1.82128	45.4861	0.384981	58.4101	3.09421	28.8344
		14.7399	73.1956	10.4559	47.9368	0.268052	46.582	1.72676	0.26963	0.83495
		19.7302	3.13493	0.771116	29.457	11.7297	11.4858	8.59688	40.8578	41.6216
		33.3946	3.64486	33.0848	31.869	13.4768	28.8989	7.34211	0.793873	0.651412
		0.486852	0.128109	0.167544	48.8672	11.1346	43.7648	3.01937	2.71875	43.7246
		0.221495	0.273541	7.90867	10.2869	26.9322	24.9531	47.7808	0.797775	33.9618
		5.87893	32.1748	38.7266	18.9336	39.529	58.4246	30.5004	7.0835	13.2314
		0.257835	0.822877	22.2921	3.95386	37.4599	13.9615	60.4433	43.8141	21.314
		71.6102	31.5119	36.7403	0.369997	0.452688	19.1559	0.850265	10.9027	0.027987
		0.0161069	62.5654	0.0601548	30.1712	54.5705	30.1078	82.2155	16.3232	20.8892
		1.44335	4.8985	56.5095	8.5754	25.7134	26.9276	39.0026	1.71986	9.98964
		1.38813	26.4625	24.2884	23.2904	18.0304	18.2059	16.7578	24.2692	76.055
		5.2084	2.28646	0.35555	8.42136	2.86851	30.4132	0.018812	7.408	0.639069
		0.695492	16.6682	0.412608	13.8825	9.37102	1.35404	1.9386	46.7345	9.1265
		0.147241	0.0923153	0.608337	6.10731	75.1592	17.7657	11.8738	12.8174	3.37177
		43.238	11.9719	54.6797	0.380309	25.7715	31.4368	19.5913	31.0403	41.7875
		22.4109	0.243927	21.6148	26.0953	44.7222	75.8494	27.6535	12.4859	34.7248
		31.5342	0.00239191	39.1254	62.5109	53.3234	36.4121	31.5025	26.1814	40.4444
		13.6104	0.0249398	0.87307	15.1365	1.06837	21.9034	26.7469	31.4264	22.2589
		81.3229	0.022312	27.6844	46.2281	12.8969	19.1229	0.648626	16.4667	0.280115
		0.0345838	0.489857	13.9612	6.26372	33.7435	35.1041	27.7898	55.5935	9.64789
		82.8997	0.0100507	36.8747	46.6934	0.815815	35.8979	15.0814	54.8275	28.68
		32.8794	38.0054	10.1758	23.953	24.4699	33.945	34.8637	87.8737	19.452
		27.3925	4.35283	5.8341	43.3519	14.4025	1.00621	12.9093	59.2532	8.49274
		24.6867	1.32274	102.945	1.32582	0.586614	23.6896	62.3159	0.931444	27.2976
		50.058	3.09552	8.44317	2.28078	60.6573	2.9317	51.0362	11.3698	54.1369
		41.9522	62.8847	5.26252	1.06431	1.4356	17.1001	0.427377	49.657	6.49538
		60.2907	15.0837	74.2754	6.72138	0.398956	0.233955	18.8921	17.5255	43.3051
		32.1802	23.6421	38.7886	10.3737	0.0260921	5.78473	6.69977	0.0767366	25.9592
		21.9463	0.0659058	11.586	0.219032	3.89286	25.2646	0.00394154	1.4045	38.8875
		8.66033	13.55	18.628	6.6323	49.5187	35.9082	31.3641	38.8244	37.7555
		41.0867	2.53473	14.0507	53.9597	14.7969	0.227246	31.5971	34.9774	33.9436
		13.0169	0.329109	0.393672	2.77361	38.8787	48.9258	39.7645	0.168509	49.3282
		21.96	0.0579859	23.206	12.843	52.7198	25.4376	38.6337	46.4612	7.83116
		35.9112	6.96811	19.7619	21.3788	12.9939	29.483	0.00549116	18.7554	48.8759
		30.2181	9.2337	9.65115	10.9282	5.50744	2.56225	45.6731	3.66541	0.0297319
		35.3815	43.3043	17.3448	27.849	54.8792	20.163	32.2178	28.4887	23.6964
		23.8504	0.000116711	22.0838	13.8724	38.6385	0.085606	30.5131	1.51749	28.824
		33.2719	27.3834	74.986	28.5387	34.7699	26.9415	37.3938	3.3267	17.5079
		13.7558	0.72597	43.904	0.40004	44.8716	18.6232	48.1168	68.1462	0.933996
		38.2629	0.703019	0.219033	7.57135	56.1282	8.08048	1.43324	19.2234	6.45428
		70.0807	0.0592961	0.211228	24.5764	40.9438	39.0115	1.29055	27.2777	43.3965
		41.0145	1.31748	23.7141	24.4796	1.54814	8.04094	37.6643	6.16357	1.10804
		12.0864	19.6444	15.6671	0.830771	8.0189	36.5299	49.9096	6.1199	4.53458
		85.7848	0.469894	11.8791	14.2717	31.9502	1.24954	34.7457	3.36195	32.1425
		9.16179	43.8918	17.5603	0.507112	10.384	11.5541	48.6212	37.9973	36.1414
		29.6156	8.98976	0.848637	26.4549	42.2104	0.323064	2.84701	40.622	25.6255
		0.0059501	0.018818	15.3387	8.07058	13.7408	4.60444	10.9982	27.5633	11.001
		0.380791	44.6022	9.23829	12.0047	1.45101	2.61632	54.8834	0.379953	30.9157
		2.29208	0.861581	48.1177	39.6307	15.2766	14.9158	52.3251	4.45942	49.1973
		64.2436	33.519	19.7102	35.0772	0.108592	40.2803	9.13929	18.3037	29.6205
		21.713	70.2936	23.8029	24.9026	2.66875	0.733014	43.9663	15.294	15.9436
		26.8043	15.682	8.31227e-05	14.2727	0.0625671	76.5047	42.4787	27.9473	23.7525
		4.79293	0.244274	29.0739	0.553409	15.7193	11.7584	10.9837	28.336	29.4909
		2.85876	36.9066	43.12	43.5281	23.7147	43.8631	17.344	3.31388	57.6821
		26.5273	19.1892	61.5514	5.56692	24.7231	27.3268	65.0287	1.16371	12.6587
		0.447583	20.702	42.3048	38.8468	21.3684	3.0257	52.1135	20.28	0.152376
		10.5269	93.918	0.0296724	0.0056454	31.4599	0.618519	31.4119	68.1333	29.1055
		56.8632	0.0157182	30.3238	17.7102	40.142	16.9752	0.132355	3.32353	35.0771
		22.1766	4.32061	1.27524	13.7491	30.8393	39.8723	46.6114	6.05831	21.1998
		2.28045	47.0913	0.915602	0.0746644	10.1851	13.8326	29.2906	6.4216	23.0026
		22.3559	8.06182	49.7923	22.0635	1.73028	30.7503	30.4518	28.7447	16.2969
		0.0892743	10.4402	34.9045	18.1808	83.9032	77.5141	22.2877	38.1654	0.990603
		11.2685	63.5553	0.923306	0.599841	0.24946	1.04686	0.557976	40.3557	33.8165
		45.0049	0.401791	73.7011	33.232	0.581609	65.4345	61.3459	25.7981	19.376
		9.8236	0.283225	0.0481276	30.6676	0.0590234	0.00965182	11.6058	18.3043	18.7165
		6.3317	21.9844	26.3282	42.7373	40.0511	27.6728	41.0476	15.5755	20.1451
		0.721374	59.8133	30.3112	52.2838	0.0627111	26.8047	82.3257	5.05428	40.292
		8.07321	29.6774	20.1491	0.984216	5.62801	0.282916	0.317689	0.443023	31.5918
		15.8046	19.7734	16.9197	46.4136	8.71513	29.1852	53.5247	27.976	0.0996897
		6.34073	9.1009	0.238664	9.0023	27.0268	19.62	81.0993	0.297273	4.29339
		23.5607	0.087895	40.3211	36.3815	4.31556	21.5575	30.969	7.00079	54.7745
		4.88849	0.166244	7.61896	39.5731	14.1547	17.9683	23.0937	9.33911	19.5692
		20.5928	1.79536	0.0685562	13.9022	1.57308	4.51285	20.8274	23.0545	32.857
		40.6435	0.592226	26.8774	11.4382	25.2565	26.4193	30.596	0.318396	0.0137185
		32.9793	34.169	92.9835	1.18517	30.5473	7.00037	3.48263	13.8866	51.4772
		63.9806	4.86869	28.8367	39.4686	2.74375	12.2378	26.1958	34.052	0.33685
		23.7281	31.0756	25.1327	25.6739	28.2337	31.2734	0.227297	46.2849	2.36329
		60.0963	0.0902653	4.74832	2.82791	43.8871	3.17831	35.7742	35.6921	49.8868
		17.7107	30.754	17.3159	53.6929	11.3474	8.50535	42.5668	30.4471	0.104307
		50.9879	0.326554	9.80421	1.4105	22.7048	35.1283	39.5158	4.25292	33.3303
		0.427864	3.49919	51.5958	11.2377	4.47359	9.55854	35.7742	53.8906	8.44469
		6.06427	39.8539	36.5845	0.55795	34.8208	13.9506	25.9481	7.52065	13.4003
		0.78477	21.2055	0.00344667	21.1252	3.05592	39.5323	42.8453	46.421	34.7483
		0.484378	78.2461	4.56006	21.6556	33.3868	12.7159	13.7492	40.7709	25.8732
		70.2411	12.3004	3.12894	1.07232	12.4414	58.1131	12.6071	36.3836	12.9854
		63.1783	0.00174136	0.109175	4.60893	0.0726236	0.129188	42.7328	15.8323	34.8674
		1.47028	1.95421	30.7084	7.33622	24.4556	32.3967	39.9817	26.8913	55.7453
		60.8773	15.1462	22.55	8.39602	15.3489	21.3771	17.7755	21.718	74.1064
		0.17386	6.50092	18.3465	18.2516	0.39158	1.03646	29.4675	33.3274	13.0325
		1.36427	26.3959	2.37895	13.4985	44.3089	1.93577	14.9587	2.33394	54.427
		11.0059	28.8326	0.300946	23.3815	2.91193	38.0494	37.7468	5.35975	0.701549
		39.096	6.95034	0.59174	19.8304	0.315125	15.8784	34.4417	33.8774	0.158475
		34.0265	0.632058	10.5406	0.551196	0.65345	33.8682	14.9418	1.13154	4.1117
		37.6362	6.20296	1.33725	3.77296	29.4474	5.19254	42.992	5.14833	0.163408
		61.1187	11.7029	19.4882	5.65721	1.93969	30.2073	29.9721	91.652	0.702948
		0.308469	3.96035	31.229	1.86085	5.42618	16.505	45.7012	5.49078	0.167503
		26.441	0.239994	2.64637	0.607413	0.651172	10.7246	28.2146	31.8112	26.1417
		7.14576	46.6917	31.7324	3.10428	0.343735	3.52478	13.6445	36.9467	28.1984
		46.4802	15.4734	17.4514	4.50983	3.58925	0.24584	14.0651	31.2442	57.5487
		93.3545	2.84198	80.2413	5.0434	1.90595	27.2153	4.38673	3.41629	12.8838
		49.9858	41.8511	0.265046	13.2345	15.9991	21.8469	54.5653	80.6176	78.2677
		27.9625	0.167078	23.2762	0.351132	62.9622	0.829976	58.1336	49.1324	22.0994
		12.5664	6.41667	16.6171	0.428137	16.1383	18.6322	5.69566	1.28726	0.29812
		22.1301	0.426223	24.4288	35.3588	59.4958	25.9697	49.038	1.57943	31.6931
		0.0720199	7.63013	37.2399	64.8888	0.358838	0.218044	22.002	52.5181	24.9742
		3.76862	8.96867	44.8778	13.2883	1.32241	6.74543	18.3042	80.4132	0.253152
		0.137886	43.5819	3.22239	0.205998	0.389037	18.3082	38.8214	26.3104	5.18769
		37.5334	6.67185	2.83632	16.4868	14.5131	38.0455	47.4666	7.05028	3.68453
		36.3702	38.9758	54.5585	40.5647	48.0959	7.45825	13.4428	0.146789	23.1619
		72.196	19.8433	0.734519	39.118	24.497	16.7221	0.0364615	0.794975	44.2177
		1.59686	51.4099	0.718366	26.1964	14.0636	55.2101	0.645154	62.7418	1.30317
		62.3618	23.2144	8.46408	49.0997	29.6476	0.967046	9.83758	26.6517	38.3809
		35.6115	0.309521	0.258612	28.1885	11.3408	50.0039	32.1947	42.3594	22.8406
		0.0268206	7.26743	0.153448	0.226942	0.524718	18.9582	9.62516	5.76883	3.97977
		0.114097	3.13508	11.7957	33.4008	4.25934	25.5682	1.83626	35.2544	92.9232
		9.63165	7.2124	13.5171	1.79046	67.2944	46.2443	0.961977	48.7391	10.3777
		22.1604	5.95858	51.9476	0.388516	48.7329	21.4985	18.3673	0.828549	24.3274
		16.7701	0.0363052	3.75473	5.50198	33.3082	65.5301	63.5949	0.321922	45.1766
		25.7239	14.0614	13.4396	7.16597	1.51713	62.5783	66.5881	36.0016	24.6577
		10.6156	0.00378767	13.1385	27.2734	0.791135	37.436	8.84898	15.1894	0.00134305
		22.9347	0.00922875	28.9846	0.892091	26.2159	48.0521	24.0496	19.6896	36.6468
		0.204833	1.4101	0.268896	61.629	0.0795633	23.3219	19.7254	24.7107	19.4735
		5.86838	0.613984	0.758967	58.0515	1.06867	35.7588	20.6463	20.293	32.2645
		0.0711391	28.9623	22.9435	3.90297	51.4512	75.0757	8.60866	1.59399	23.0577
		48.7503	15.9679	23.1237	2.42347	17.6973	49.3155	19.9334	64.4516	33.0145
		0.879675	50.3962	8.2127	10.1371	21.4389	17.2659	58.2993	54.5487	8.71957
		32.8279	34.3941	67.194	21.1271	0.232537	11.4606	92.0807	0.150559	33.0833
		6.03837	2.18696	39.7911	0.679965	14.7914	47.2282	22.4782	5.1579	9.58688
		6.52867	3.69342	2.74577	32.3361	31.3853	28.8537	35.4363	28.9085	17.8622
		0.568878	0.946889	3.28294	58.9452	22.3654	54.1552	36.8971	73.7302	25.2177
		0.552033	9.75387	54.9046	27.2854	0.473006	11.482	8.29207	45.1956	14.456
		73.2618	0.140697	69.3833	17.6778	50.6687	15.3457	40.5211	12.5602	3.44422
		66.2695	62.8406	20.6943	38.024	52.2856	36.7419	58.8896	35.8324	37.2773
		26.2648	23.1118		21.9165	0.567094	25.9128	40.8688	28.6648	30.4008
		67.1698	64.2408		25.1632	51.0511	32.1824	27.3813	3.12416	24.2105
		13.8349	27.9731		1.22917	54.8278	31.6229	14.8674	44.2516	37.5514
		0.113923	25.328		21.8621	54.839	2.16531	28.7903	0.87136	11.802
		9.50412	21.3959		46.0966	0.179078		28.01	42.4366	40.941
		86.4591	26.0361		8.43779	51.9501		14.1667	50.7	45.9042
		41.7088	3.06477		27.6024	48.6669		30.0532	7.11335	50.8551
		1.00777	5.70421		51.6339	0.229175		0.233552	24.0062	11.3493
		21.2254	15.0499		14.1682	10.3521		14.6236	25.2029	12.9756
		1.43059	20.6342		8.85404	10.6541		24.2448	33.1394	27.8934
		1.51042	63.4926		2.36906	25.9818		76.4346	0.212751	40.8768
		4.59524	23.8129		11.6902	4.16171		103.816	40.1323	46.2375
		31.5839	9.72827		1.46221	33.2488		30.8907	7.44477	30.9421
		13.0128	5.9951		36.3058	33.9089		52.3302	63.7136	34.4773
		48.2737	2.30962		18.0808	50.397		47.7715	37.8007	20.7367
		81.6195	1.86744		7.51954	40.4852		38.9509	13.7115	5.82808
		23.283	2.12148		44.0928	24.9422		0.627862	6.20228	24.5478
		22.9788	0.497359		70.2456	10.5831		62.6568	28.5123	1.61233
		65.0623	23.2584		1.09549	66.241		18.8466	0.581051	12.5678
		0.109144	1.20233		57.0275	41.7748		29.0743	36.9371	0.15643
		46.8463	60.3904		28.0371	86.5414		7.28845	6.66544	27.0943
		22.1476	35.7504		0.0972411	46.8311		61.8378	22.5214	38.6223
		44.2359	37.7075		1.54022	0.0643739		50.7634	2.5735	12.6928
		16.5379	2.03575		47.8744	24.906		46.0802	17.7732	48.1044
		8.27178	0.496497		37.5051	39.3584		45.4544	16.802	14.6345
		43.9906	0.131763		39.9632	34.5874		51.7951	0.304568	34.899
		69.5134	16.8359		0.345915	36.4398		45.0565	29.547	48.3564
		5.55	24.4577		0.105487	18.9096		35.168	33.8094	36.9768
		88.2728	0.700146		7.41151	6.13063		59.7893	36.9384	28.7234
		9.48552	0.56884		0.792872	7.67562		35.6233	1.0596	59.2659
		22.5933	1.32175		24.152	29.4071		3.70737	27.4301	49.0417
		30.1605	1.14312		0.35039	0.276102		12.3309	30.472	55.3208
		14.6089	0.654764		47.4244	20.546		27.7218	28.3784	14.5619
		16.2966	45.1186		1.59903	61.6275		61.4559	22.1944	28.7444
		8.56586	25.7629		0.0370866	46.4464		0.45073	7.89695	43.6248
		10.8246	10.5008		16.324	45.5579		0.817394	14.0697	40.8704
		13.1492	0.032599		36.0748	33.515		29.56	0.143891	17.2402
		28.1437	0.768595		0.215806	11.0802		29.4203	3.87992	22.2749
		55.521	1.0035		0.0413682	0.293024		0.417282	8.60916	20.3621
		23.1751	28.0528		30.4928	3.1044		0.40685	26.9002	27.0778
		11.6183	0.470539		30.2712	7.22033		3.58931	36.6174	48.5829
		38.3966	36.7985		11.2662	45.1802		50.9017	76.5926	132.384
		28.1607	40.1112		0.0599621	5.72769		36.3735	0.289716	18.069
		4.34852	28.9004		7.97957	21.1973		4.09482	33.6725	50.9828
		1.52129	38.7284		28.894	17.6147		12.2861	18.933	0.188091
		1.52511	37.6357		1.02312	45.647		45.7422	21.0563	53.4461
		57.3432	11.7985		28.4828	29.283		35.7561	37.2187	33.5396
		26.5692	3.02107		59.7725	32.3446		51.8117	0.37946	29.6628
		1.53885	5.94763		0.0435126	16.477		59.4672	39.6501	1.34873
		34.8596	0.249999		0.180123	16.3161		23.3544	52.8535	0.164479
		0.218043	6.89457		2.2756	22.986		48.7828	39.1498	73.8355
		42.6439	20.8746		12.8365	1.13319		11.1947	0.0318245	17.9736
		32.5122	0.490595		1.59325	4.34804		12.1547	26.4568	0.811258
		35.0955	0.711037		70.3351	41.4855		36.3439	65.8841	0.263629
		17.7095	41.5553		11.6521	16.9375		0.243742	14.3331	4.71204
		8.9551	33.4977		55.4475	40.6657		0.113854	26.8612	31.8747
		21.7471	61.4952		68.7803	2.20012		21.4769	37.5447	31.8838
		7.1388	0.639917		6.13248	3.3161		56.3235	6.73956	50.1025
		50.9546	1.00498		2.38451	33.5729		29.7761	9.56255	21.7087
		5.67216	29.8111		8.11965	63.817		11.4888	51.7462	1.46311
		26.1123	27.3079		59.3162	13.2325		70.0063	51.4986	25.7687
		42.7869	38.4489		32.9319	63.0388		3.53806	0.478527	6.11966
		35.1289	5.77224		56.5167	32.512		49.888	0.0242552	14.1264
		10.2539	43.4999		18.3975	36.6454		37.3668	2.28806	0.263195
		5.16181	33.7045		8.2554	72.2244		53.198	0.232248	17.7067
		32.5568	40.7968		41.0016	63.9114		0.403948	0.206878	0.0978722
		0.45164	69.4754		17.6905	33.8315		0.727468	16.8451	8.01627
		54.3984	21.2971		21.981	8.66727		68.2486	31.7974	6.07317
		1.77586	2.53291		34.2697	31.0102		46.5255	43.5469	49.1235
		0.131695	7.37667		0.535458	47.5603		18.8624	19.9591	48.231
		0.221698	20.9201		31.8501	38.1264		0.114051	35.8169	37.7333
		22.8141	33.2836		31.4693	18.2563		0.307369	22.6512	0.599978
		4.57091	0.278085		0.00794547	20.7492		6.36986	14.4155	43.6879
		37.2164	31.9102		1.61524	1.52155		32.9614	23.3084	0.830354
		41.7322	16.2115		0.512464	43.3383		14.0911	15.1481	0.202344
		59.3842	103.327		66.6825	0.130543		11.3808	5.43918	23.2814
		32.957	52.5732		10.6722	1.42489		21.0361	28.9935	18.6618
		22.2553	0.628444		4.75592	47.7993		41.7231	38.4231	28.0745
		0.0403107	5.91353		51.7968	2.35553		1.95316	2.01505	32.0908
		3.02531	27.5663		29.0408	0.125392		42.2987	30.5766	32.3943
		0.154115	0.890721		35.4606	0.480943		32.4679	51.4518	5.23102
			12.7649		61.8435	19.5042		40.1157	0.262277	13.5938
			20.201		85.8548	1.01023		54.2589	1.5548	25.7963
			0.647575		0.436058	17.6006		63.1928	40.8032	20.7756
			5.20137		26.8929	0.57588		116.726	0.56948	38.854
			4.78267		37.8578	17.4281		22.9328	0.0761586	6.93874
			0.0435261		29.2212	44.6334		0.0872554	53.9288	1.11787
			24.3273		19.3169	0.269004		24.6767	13.537	38.7147
			32.5129		0.310223	0.262102		41.1044	11.344	46.53
			1.40643		1.9734	32.9249		45.0734	19.5281	16.3767
			3.81392		15.953	0.184044		1.0771	34.0481	14.0035
			44.2482		55.1441	49.664		10.2221	0.625863	55.316
			9.7273		55.2946	13.5083		37.9527	0.721566	4.53866
			6.87407		1.68118			0.0408871	46.9739	5.87081
			26.4198		8.27117			49.0872	9.8644	9.55682
			56.8292		12.3818			58.9871	32.5431	1.3556
			21.6421		0.110054			25.6946		22.2802
			55.0818		69.9284			38.0533		23.3948
			54.8109		31.7846			35.6876		0.154829
			1.61066		4.6478			4.14528		24.0621
			2.36277		25.9253			16.1335		27.6166
			0.0431865		1.2567			61.5133		4.82542
			32.5283		30.2623			37.6991		1.01
			25.2342		0.117561			8.71114		24.7534
			21.7492		31.2482			31.9866		42.5577
			48.2873		2.69939			41.8736		5.08888
			1.79371		0.00531852			46.1574		1.6487
					27.1436			70.2416		48.656
					10.2639			0.31552		20.7351
					38.1032			0.113871		41.7789
					45.55			38.5376		43.2782
					31.9984			27.0418		4.30645
					8.2623			23.044		6.35506
					0.782957					36.7653
					36.2627					22.4497
					6.20119					3.07254
					0.249632					1.74069
					37.7545					42.2718
					11.3159					1.7651
					15.8517					59.8026
					36.3026					34.764
					23.4305					31.7986
					21.9203					35.3409
					11.1027					28.9885
					32.1392					1.2676
					0.137418					46.3497
					21.9429					31.2758
					12.4767					1.13931
					19.7783					1.25585
					30.006					0.135029
					47.0726					28.0197
					29.0373					0.716713
					0.953867					2.11692
					0.0701308					47.7829
					26.2602					31.3374
					0.206247					0.298102
					6.83418					0.419191
					7.52883					39.0423
					3.11995					55.2443
					0.380374					0.0410922
					0.23308					8.95243
					0.0687991					0.72942
					27.7343					22.1381
					15.0072					19.0523
					42.0805					22.8119
					0.377155					47.4022
					41.476					2.67457
					25.2852					27.1562
					18.0582					7.0775

## Sheet: Fig.4F
	Figure 4F. Karyotyping analysis in mouse ESCs treated with indicated compounds.
		Farrerol				SCR7		RS-1
	0	0.1 μM	1 μM	5 μM	10 μM	0.1 μM	1 μM	1 μM	10 μM
	13/16	10/12	8/10	9/12	10/13	6/10	6/12	6/12	4/12
	10/13	9/12	12/14	9/12	10/14	8/12	7/13	7/12	6/12
	10/12	11/13	10/13	9/11	9/14	8/13	8/13	7/12	4/12

## Sheet: Figure 4 - figure supplement 1B
		Figure 4-figure supplement 1B. gamma H2AX foci number per nucleus in HCA2-hTERT cells treated with indicated compounds.
					Farrerol												SCR7						RS-1
		0			0.1 μM			1 μM			5 μM			10 μM			0.1 μM			1 μM			1 μM			10 μM
		8	0	0	11	0	0	13	0	6	1	0	0	7	0	0	18	4	0	2	1	0	0	11	0	17	16	0
		12	0	0	6	0	3	6	0	11	10	1	0	12	0	0	2	16	0	8	0	0	0	17	7	18	1	0
		7	6	0	3	0	6	2	0	10	10	20	0	14	0	0	1	18	0	19	0	0	0	0	8	4	1	1
		1	7	0	11	1	1	9	0	0	2	15	15	7	0	0	21	15	0	28	0	0	19	2	8	8	21	21
		29	1	1	5	7	6	1	10	0	0	6	9	7	0	0	7	19	0	18	6	0	14	18	3	1	0	1
		0	4	7	0	2	0	0	4	0	0	2	5	0	11	0	13	5	18	15	29	0	0	5	4	1	0	1
		7	9	12	0	6	0	0	7	0	0	0	17	0	5	0	0	21	1	11	18	12	2	8	12	8	12	5
		0	4	1	0	0	0	0	6	0	1	0	0	0	8	18	0	1	16	1	12	16	9	4	0	8	0	6
		7	8	2	1	0	0	0	10	0	18	9	0	0	0	9	0	15	15	22	1	0	2	6	0	0	0	0
		10	12	15	1	0	0	0	5	1	3	7	12	0	0	7	0	0	16	0	5	1	12	12	1	0	0	0
		4	3	0	0	0	0	0	8	7	12	6	14	0	0	0	0	0	0	0	14	1	18	0	2	0	0	0
		0	1	1	0	10	1	30	0	1	0	6	19	13	0	0	1	0	0	0	0	8	7	16	10	0	0	11
		0	9	14	0	1	1	15	0	0	1	0	1	8	0	0	29	0	0	0	0	32	0	3	12	8	13	6
		0	12	0	0	4	1	6	0	0	1	0	0	7	0	22	28	0	0	2	0	23	0	1	5	1	5	13
		0	8	0	0	1	3	17	0	0	13	0	0	2	7	1	20	0	0	14	0	30	0	1	2	11	10	10
		0	2	0	0	2	1	9	1	1	9	0	1	10	9	2	4	0	0	12	0	0	0	0	1	0	1	0
		0	0	0	0	1	6	4	9	3	0	3	4	5	1	1	1	0	0	15	0	0	11	8	1	0	6	0
		0	6	0	0	15	9	0	1	17	0	12	9	0	0	3	0	36	0	0	7	5	11	2	1	0	0	20
		0	10	0	0	0	12	2	1	1	0	2	3	0	0	1	0	5	0	0	5	6	8	12	0	0	0	1
		23	23	16	0	0	0	10	12	0	0	1	0	0	0	7	9	7	0	0	13	29	8	1	0	0	0	1
		11	6	10	0	0	0	9	13	0	2	0	0	0	0	2	2	1	0	0	7	11	12	0	17	1	11	1
		1	1	13	1	0	0	8	0	0	14	0	0	0	0	0	33	7	2	0	12	0	0	0	15	12	9	13
		16	4	8	1	19	0	3	0	0	0	3	4	0	0	0	9	4	8	0	5	0	0	0	13	3	6	2
		9	18	7	9	0	13	0	0	0	0	8	1	10	0	9	16	1	9	0	12	0	0	13	15	13	5	0
		1	4	3	5	7	0	0	0	0	0	0	5	2	8	3	5	1	23	22	0	0	11	3		9	2	0
		1	1	7	5	5	0	1	0	10	0	0	1	6	9	1	13	0	12	19	0	0	0	1		0	1	0
		10	9	6	0	1	6	1	6	6	1	0	0	8	5	0	13	0	0	0	11	0	0	0		0	14	21
		0	11	8	0	1	7	9	7	14	2		0	7	0	2	4	0	0	13	0	0		1		16	17	9
		0	9		16	0	1	1		12	0		0	11	0	1	6	0	0	0	0	26		2		0	0	14
		0	5		6	0	0	0		9			0	0	0	6	0	0	0	0	0	27		7		0	9	6
		2			4	0	0	0		1			0	0	0	0	0	0	0	0	0	16		0		0	3	17
					0	0	0	0		0			2	0	0	0	0	0	0	0	0	8				0	0
					0	0	0						3	0	0	0	0	0	0	0	0	20				11
														7	0	0	7	0	0	0	0	27				12
														10	12	0	2	22	2	0	19	0
														8	15	12	4	2	18	0	14	0
														2	5	5	22	5	5	0	9	16
														3	6	1	0	13	1	0	7	28
														0	4	5	0	16	15	0	13	11
														0	0	1	0	25	18	34	25	7
																	0	12	0	23	0	0
																	0	0	11	0	21	0
																	0	0	23			0
																	0	0

## Sheet: Figure 4 - figure supplement 1D
		Figure 4-figure supplement 1D. 53BP1 foci number per nucleus in HCA2-hTERT cells treated with indicated compounds.
					Farrerol												SCR7						RS-1
		0			0.1 μM			1 μM			5 μM			10 μM			0.1 μM			1 μM			1 μM			10 μM
		1	8	15	11	7	3	3	1	3	7	5	4	11	13	4	3	1	0	1	3	6	11	0	1	5	2	1
		21	5	2	9	2	3	5	2	4	3	5	1	4	3	8	3	5	0	6	1	7	3	13	4	2	4	2
		5	0	5	8	4	12	9	14	8	1	14	5	11	7	13	14	0	0	2	6	1	16	1	14	3	0	5
		11	0	2	8	20	0	4	1	3	8	7	1	4	3	3	27	6	0	11	7	6	1	4	21	22	0	1
		9	0	0	3	3	1	1	4	11	11	18	2	3	6	2	2	1	0	12	1	8	6	11	5	14	6	3
		8	3	0	6	2	13	2	8	5	3	3	2	3	2	1	6	15	0	6	1	0	1	4	1	0	10	3
		4	2	0	12	2	11	5	6	4	2	0	8	4	1	2	2	16	0	1	3	0	14	8	0	15	8	5
		2	4	3	5	0	1	4	2	4	4	0	2	1	12	0	4	2	3	7	2	0	0	3	0	15	14	7
		2	8	3	21	0	8	3	0	0	6	0	3	1	0	0	12	0	2	0	3	0	0	6	0	7	9	3
		8	5	7	4	0	0	0	0	0	5	0	3	0	0	0	11	13	7	0	27	4	0	0	0	0	24	11
		5	2	8	4	0	0	8	0	0	6	0	3	0	4	0	7	12	1	0	10	2	0	0	0	4	8	0
		11	1	12	0	0	4	14	0	8	5	0	1	0	2	4	0	4	17	8	1	22	4	0	0	7	1	0
		10	11	12	2	4	4	0	7	5	2	0	3	21	5	1	0	1	5	2	0	11	6	0	0	8	5	0
		0	11	3	3	15	3	0	4	6	0	0	0	3	10	1	0	5	7	19	0	11	1	0	0	0	4	0
		0	0	7	10	4	1	9	3	8	0	0	0	5	7	1	0	0	3	6	0	18	1	0	0	0	6	0
		0	0	6	8	2	2	4	17	5	0	6	0	1	7	2	3	0	0	1	3	0	3	3	0	0	3	18
		0	3	11	2	3	2	2	7	14	0	3	0	38	5	1	5	0	0	3	1	0	2	5	0	0	19	6
		4	4	0	0	2	1	1	7	0	6	1	0	4	4	0	1	6	0	1	1	0	3	3	9	0	0	4
		8	5	0	0	0	0	9	7	0	5	4	0	0	5	0	3	8	0	1	4	7	2	10	2	4	0	2
		9	5	0	0	4	0	0	6	0	17	12	0	0	23	0	0	3	18	2	14	12	0	2	6	2	4	9
		4	15	0	0	10	0	0	3	0	5	0	1	0	0	0	10	3	0	6	4	12	0	6	2	4	4	10
		2	1	0	22	8	2	0	0	11	1	0	4	0	0	0	10	2	10	13	2	0	0	0	2	4	3	6
		5	1	9	20	6	8	0	20	0	1	0	3	5	0	0	4	6	1	0	12	3	0	0	4	4	11	1
		16	8	3	4	2	14	0	8	6	5	0	4	4	3	0	4	6	2	0	0	7	1	0	3	2	1	4
		1	5	12	2	3	4	3	2	1	6	0	8	1	4	0	0	1	4	0	0	5	3	5	24	6	0	4
		5	9	4	5	0	9	3	0	5	14	0	2	1	4	0	5	2	10	8	0	0	0	9	14	0	0	1
		0	0	3	9	0	0	1	4	9	12	3	0	0	1	0	6	6	0	7	0	0	3	13	0	2	0	6
		0	0	4	6	11	0	14	9	4	4	4	0	0	1	4	4	0	0	8	0	0	2	0	0	6	0	0
		0	0	4	4	27	0	4	3	1	2	5	0	0	5	11	5	0	6	0	0	0	2	0	0	0	0	18
		0	0	1	1	3	6	9	3	16	1	2	0	6	5	16	4	0	8	13	10	0	5	0	0	5	0
		0	0	7	2	7	8	3	12	9	0	1	0	3	5	9	2	0	11	6	1	0	0	0	0	7	0
		9	0	0	4	4	14	2	3	2	0	12	4	1	2	10	7	6	0	3	1	1	0	0	0		0
		0	16	0	6	9	0	0	4	9	0	18	11	10	0	2	4	9	11	5	16	3	9	0	0		1
		7	0	1	2	10	0	0	5	4	0	12	4	9	0	0	1	2		0	12	1	0	10	0
		3	0	3	4	0	0	7	5	1	3	1	3	7	0	0				0	8	1	7	0	0
		9	12	1	6	0	0	6	0	2	13	4	5	0	4	12				0		2	2	0	0
		5	7	5	0	0	10	15	4	0	4	0	13	0	2					0		10	5	1	0
		1	4	4	0	0	9	8	1	0	12	0	0							0		3	1	4	0
		4	8		8	4	0	9	0	0	5	8	0							0		0	0	20
					0		0	0	2		3	5	5							0		0	11
					0		0	11			7	5	4							0		3
							2				2	8	8							3		4
											7	4	5							1		3
											1	1	1									14
											0	1	15									3
											0	5	19									6
											0	2	2									3
											0	8	0									15
											0	0	0									8
											0	0	0									9
											6	0	0									4
											1	0

## Sheet: Figure 4 - figure supplement 2
	Figure 4-figure supplement 2. EdU incorporation analysis in mouse ESCs treated with farrerol at indicated concentrations.
	%	Farrerol
	0	0.1 μM	1 μM	5 μM	10 μM
	62.4	58.3	56.3	55	62.6
	59.1	57.1	52.5	58.3	56.7
	63	60.3	53.5	63.2	60.8
	61.6		60
	61.2		63.3
	61.7		62.2
