# Supplementary material for: A high-throughput small molecule screen identifies farrerol as a potentiator of CRISPR/Cas9-mediated genome editing
Source: eLife. 2020 Jul 9;9:e56008. doi: 10.7554/eLife.56008 (PMC7380943; doi:10.7554/eLife.56008)
Supplement: Figure 5—source data 1. [file elife-56008-fig5-data1.xlsx]

## Sheet: Fig.5A-B
	Figure 5A-B. The in vitro development potential of mouse embryos treated with indicated doses of molecules during the whole embryonic stages.
				Farrerol				SCR7		RS-1
		0		0.05 μM		0.1 μM		20 μM		7.5 μM
	2C	100	100	100	100	100	100	100	100	100	100
	4C	89.47	100	95.2	100	100	100	84.2	83.33	100	100
	8C-Morula	89.47	100	90.48	85.71	100	100	78.95	83.33	96	100
	Blastocyst	89.47	100	90.48	85.71	100	100	73.68	66.67	96	100
	hatching embryo	78.95	84.2	85.71	80.95	90	84.2	47.37	38.89	80	72

## Sheet: Fig.5C
	Figure 5C. The in vitro development potential of mouse embryos treated with small molecules for 24 h upon DSBs were induced by Cas9 mRNA and sgRNA targeting the Cdx2 locus.
	%			Farrerol		RS-1		SCR7
		0		0.1 μM		7.5 μM		20 μM
	2C	100	100	100	100	100	100	100	100
	4C	88.89	100	96.43	96.55	100	96	92.86	100
	8C-Morula	85.19	92.31	92.86	96.55	96.15	84	85.71	92.86
	Blastocyst	74.07	73.08	78.57	86.21	76.92	64	60.71	64.29

## Sheet: Fig.5G-H
	Figure 5G-H. The percentage of successfully targeted blastocysts at the Actb locus.
	Actb site
				Farrerol		SCR7	RS-1
	mCherry		0	0.05 μM	0.1 μM	20 μM	7.5 μM
		mCherry+	26	47	37	33	45
		total	185	172	176	172	273
		%	14.0541	27.3256	21.0227	19.186	16.4835
		significance		**	n.s.	n.s.	n.s.
				Farrerol		SCR7	RS-1
	PCR		0	0.05 μM	0.1 μM	20 μM	7.5 μM
		5'+3' junction	23	39	32	23	36
		total	171	143	139	152	202
		%	13.4503	27.2727	23.0216	15.1316	17.8218
		significance		**	*	n.s.	n.s.

## Sheet: Figure 5 - figure supplement 1B
	Figure 5-figure supplement 1B. The In vitro development potential of mouse embryos treated with indicated molecules for a short period.
	%					Farrerol								RS-1				SCR7
		0				0.05 μM				0.1 μM				7.5 μM				20 μM
	2C	100	100	100	100	100	100	100	100	100	100	100	100	100	100	100	100	100	100	100	100
	4C	89.95	100	100	100	100	100	96.55	100	100	100	100	100	100	100	100	96.15	100	100	96.15	100
	8C-Morula	89.95	100	100	100	100	96.3	96.55	100	100	96.15	100	100	92.31	100	100	96.15	100	100	92.31	100
	Blastocyst	89.95	100	100	91.3	96.15	96.3	96.55	100	96.15	92.3	100	96.78	92.31	96	96.15	96.15	100	96.15	92.31	100

## Sheet: Figure 5 - figure supplement 1D
	Figure 5-figure supplement 1D. The percentage of successfully targeted blastocysts at the Actb locus.
				Farrerol		SCR7	RS-1
			0	0.05 μM	0.1 μM	20 μM	7.5 μM
		5'+3'	23	39	32	23	36
		5'junction	41	39	45	36	111
		3'junction	12	6	7	15	6
		no band	95	59	55	78	49
		total	171	143	139	152	202
