# Supplementary material for: A high-throughput small molecule screen identifies farrerol as a potentiator of CRISPR/Cas9-mediated genome editing
Source: eLife. 2020 Jul 9;9:e56008. doi: 10.7554/eLife.56008 (PMC7380943; doi:10.7554/eLife.56008)
Supplement: Figure 6—source data 1. [file elife-56008-fig6-data1.xlsx]

## Sheet: Fig.6C-D 
	Figure 6C-D. The percentage of successfully targeted blastocysts at the Cdx2 locus.
				Farrerol		SCR7	RS-1
			0	0.05 μM	0.1 μM	20 μM	7.5 μM
		mCherry+	29	55	72	38	45
		total	170	205	251	144	192
		%	17.0588	26.8293	28.6853	26.3889	23.4375
		significance		*	**	*	n.s.
				Farrerol		SCR7	RS-1
			0	0.05 μM	0.1 μM	20 μM	7.5 μM
		5'+3'	46	85	64	45	55
		total	144	152	126	117	186
		%	31.9444	55.9211	50.7937	38.4615	29.5699
		significance		****	**	n.s.	n.s.

## Sheet: Fig.6E
	Figure 6E. The influence of different knock-in strategies on generation of gene-targeting mice.
	Target	Description	Mouse Background	Injection mix	Small chemicals treatment (μM)	No. of embryos transferred	No. of survival recepist	No. of kits	Corrected knockin mouse	Knockin kits (%)
	Cdx2	mCherry insertion	C57 × C57	Cas9 mRNA; sgRNA; donor	/	140	7	16	0	0
			BDF1 × BDF1	Cas9 mRNA; sgRNA; donor	/	190	10	37	1	2.7027
			BDF1 × BDF1	Cas9 mRNA; sgRNA; donor with enzyme cuting (HMEJ)	/	70	3	16	0	0
			BDF1 × BDF1	Cas9 mRNA; sgRNA; donor	0.05	160	9	33	12	36.3636

## Sheet: Figure 6-figure supplement 1A
		Figure 6-figure supplement 1A. The percentage of successfully targeted blastocysts at the Cdx2 locus.
				Farrerol		SCR7	RS-1
			0	0.05 μM	0.1 μM	20 μM	7.5 μM
		5'+3'	46	85	64	45	55
		5'junction	18	6	3	6	26
		3'junction	42	24	30	40	20
		no band	38	37	29	26	85
		total	144	152	126	117	186

## Sheet: Figure 6-figure supplement 2A&C
		Figure 6-figure supplement 2A,C. The percentage of successfully targeted blastocysts at the Actb locus (intra-cytoplasmic injection).
				Farrerol		SCR7	RS-1
			0	0.05 μM	0.1 μM	1 μM	7.5 μM
		mCherry+	18	31	36	13	17
		total	122	91	94	91	98
		%	14.7541	34.0659	38.2979	14.2857	17.3469
		significance		***	****	n.s.	n.s.
				Farrerol		SCR7	RS-1
			0	0.05 μM	0.1 μM	1 μM	7.5 μM
		5'+3'	20	27	33	13	12
		5'junction	57	45	44	49	29
		3'junction	2	2	3	0	14
		no band	43	17	13	26	67
		total	122	91	93	88	122

## Sheet: Figure 6-figure supplement 2B&D
		Figure 6-figure supplement 2B,D. The percentage of successfully targeted blastocysts at the Cdx2 locus (intra-cytoplasmic injection).
				Farrerol		SCR7	RS-1
			0	0.05 μM	0.1 μM	1 μM	7.5 μM
		mCherry+	15	22	18	13	16
		total	97	73	51	53	62
		%	15.4639	30.137	35.2941	24.5283	25.8065
		significance		*	**	n.s.	n.s.
				Farrerol		SCR7	RS-1
			0	0.05 μM	0.1 μM	1 μM	7.5 μM
		5'+3'	6	21	16	11	13
		5'junction	10	6	7	3	6
		3'junction	4	12	5	10	12
		no band	25	12	22	30	26
		total	45	51	50	54	57
