# Supplementary material for: A high-throughput small molecule screen identifies farrerol as a potentiator of CRISPR/Cas9-mediated genome editing
Source: eLife. 2020 Jul 9;9:e56008. doi: 10.7554/eLife.56008 (PMC7380943; doi:10.7554/eLife.56008)
Supplement: Table 1—source data 1. [file elife-56008-table1-data1.xlsx]

## Sheet: PCR primer
	PCR primer sequence
	Target name	Primer name	Sequence(5' > 3')	Description	Reference
	AAVS1	HR-AAVS1-F	gccgtctctctcctgagt	Primer 1#	PMID: 23287722
	AAVS1	HR-Puro-R	gtgggcttgtactcggtcat
	AAVS1	GFP-F	acgtaaacggccacaagttc	Primer 2#	This paper
	AAVS1	GFP-R	gaactccagcaggaccatgt
	Actb	mActb-HR-F	ccatctacgagggctatgct	5' junction	This paper
	Actb	mActb-HR-R	gtgggcttgtactcggtcat
	Actb	3' Actb-puro-F	gtgtctctcactcggaaggac	3' junction
	Actb	3'inner-R	gcctaggtttctggaggagt
	Actb	5'outer-F	ccctgagtgtttcttgtggc	5' junction	PMID: 28524166
	Actb	5'outer-R	tggagccgtacatgaactga
	Actb	5'inner-F	ccatctacgagggctatgct
	Actb	5'inner-R	tgaagcgcatgaactccttg
	Actb	3'outer-F	gccccgtaatgcagaagaag	3' junction
	Actb	3'outer-R	aggtagtgttagtgcaggcc
	Actb	3'inner-F	ctacgacgctgaggtcaaga
	Actb	3'inner-R	gcctaggtttctggaggagt
	Cdx2	5'outer-F	acttggacagagaaagagcgatt	5' junction	PMID: 28524166
	Cdx2	5'outer-R	tccatgtgcaccttgaagc
	Cdx2	5'inner-F	aacaaaggtccagtctacgcat
	Cdx2	5'inner-R	ggccatgttatcctcctcgc
	Cdx2	3'outer-F	gacggccccgtaatgcagaa	3' junction
	Cdx2	3'outer-R	tagcttgcaaccagagaagatgt
	Cdx2	3'inner-F	ctacgacgctgaggtcaaga
	Cdx2	3'inner-R	cgacttcccttcaccatacaac
