# Supplementary figures and images for: A high-throughput small molecule screen identifies farrerol as a potentiator of CRISPR/Cas9-mediated genome editing
Source: eLife journal article supplement (doi:10.7554/elife.56008), 2020-07-09

A

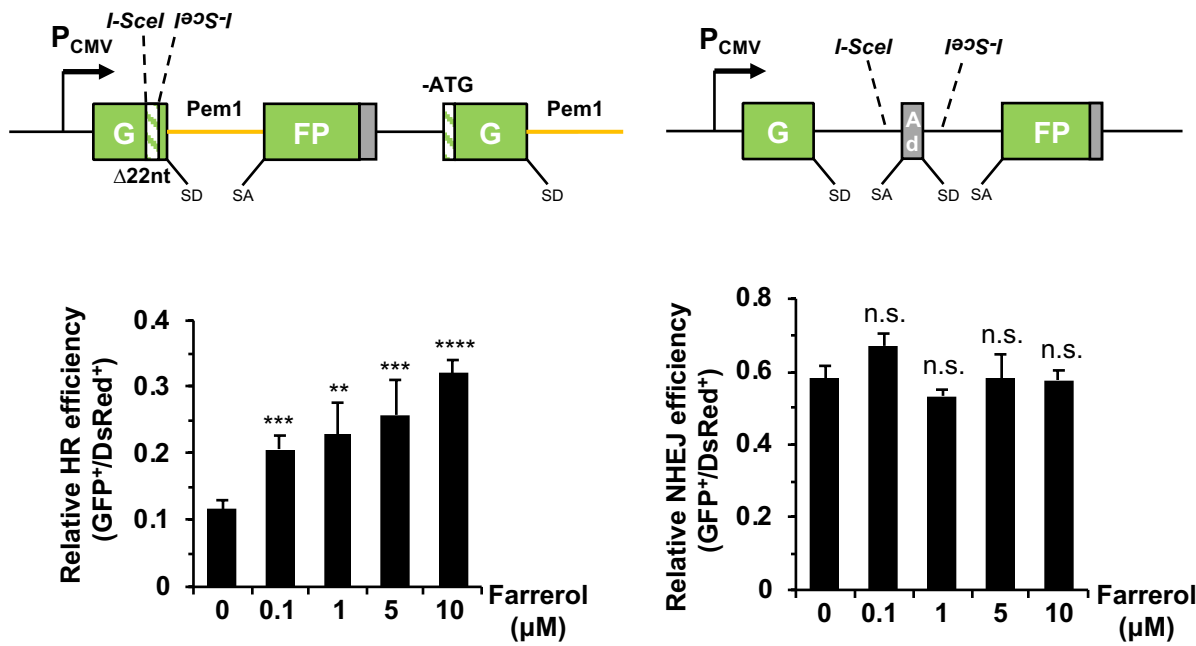

B

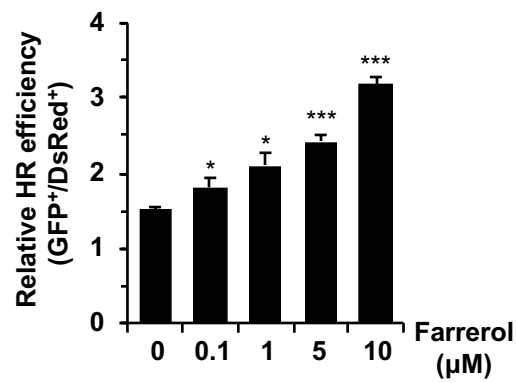

Figure 1 - figure supplement 1

Supplement: supp [file elife_poa_e56008_Figure_1_figure_supplement_1.pdf › elife_poa_e56008_Figure_1_figure_supplement_1.pdf]

**A**

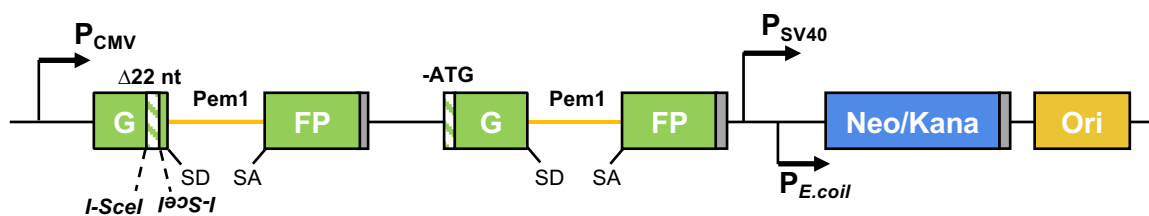

**B**

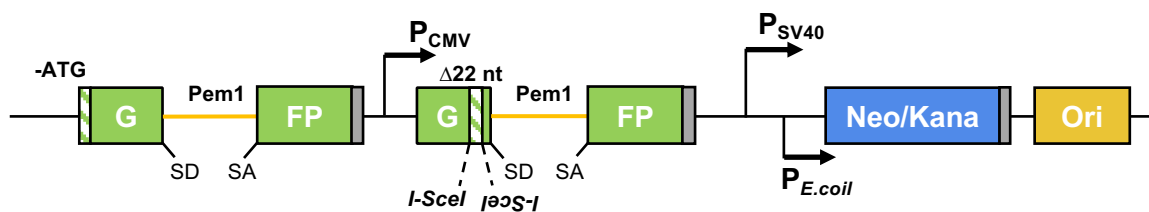

**C**

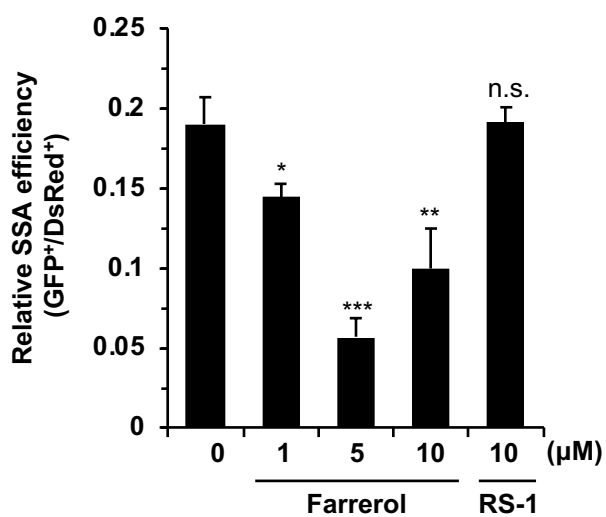

**Figure 1 - figure supplement 3**

Supplement: supp [file elife_poa_e56008_Figure_1_figure_supplement_3.pdf › elife_poa_e56008_Figure_1_figure_supplement_3.pdf]

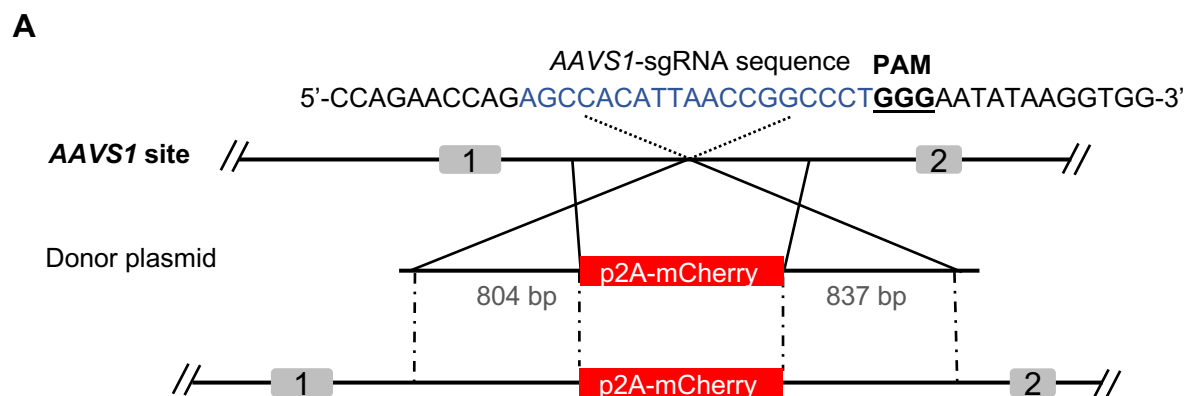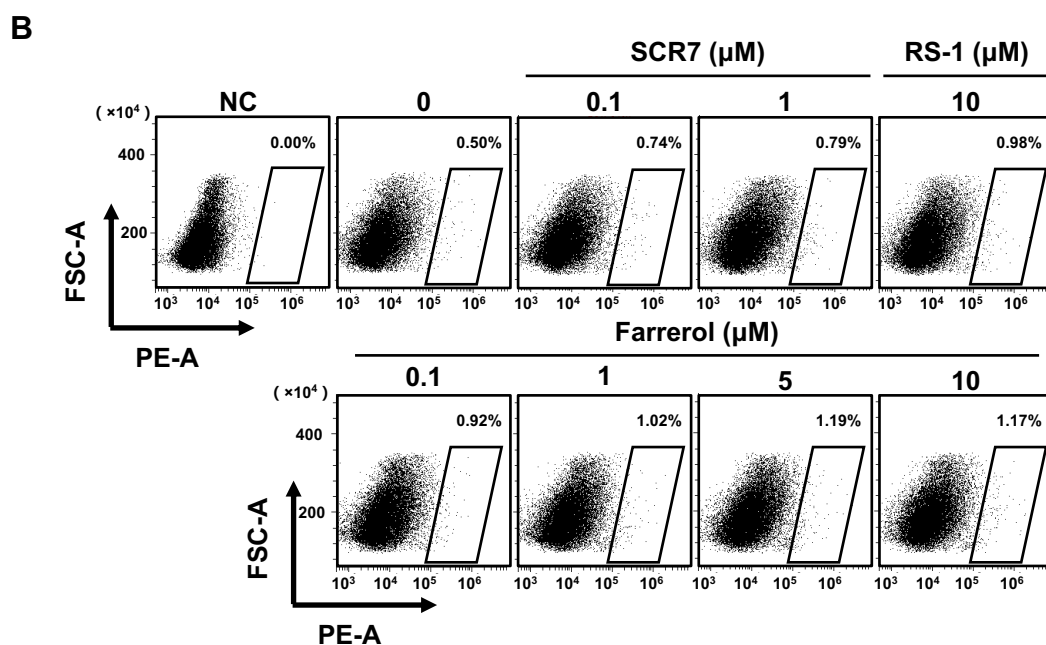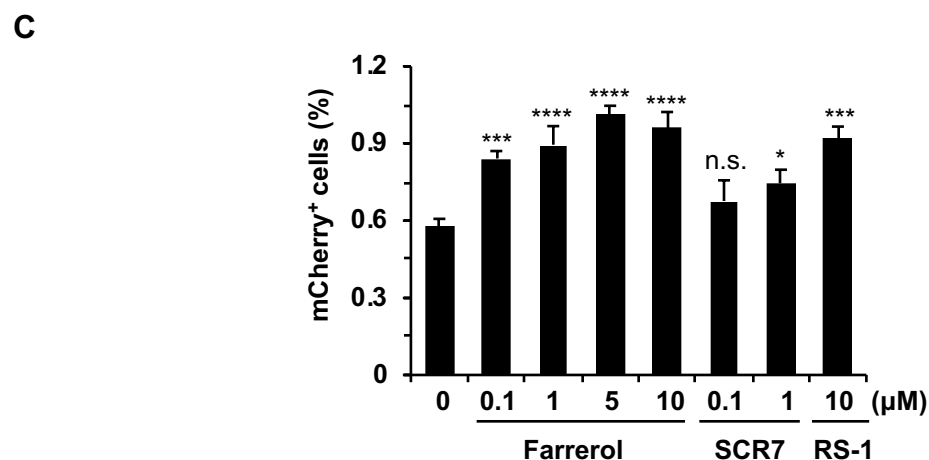

**Figure 2 - figure supplement 1**

Supplement: supp [file elife_poa_e56008_Figure_2_figure_supplement_1.pdf › elife_poa_e56008_Figure_2_figure_supplement_1.pdf]

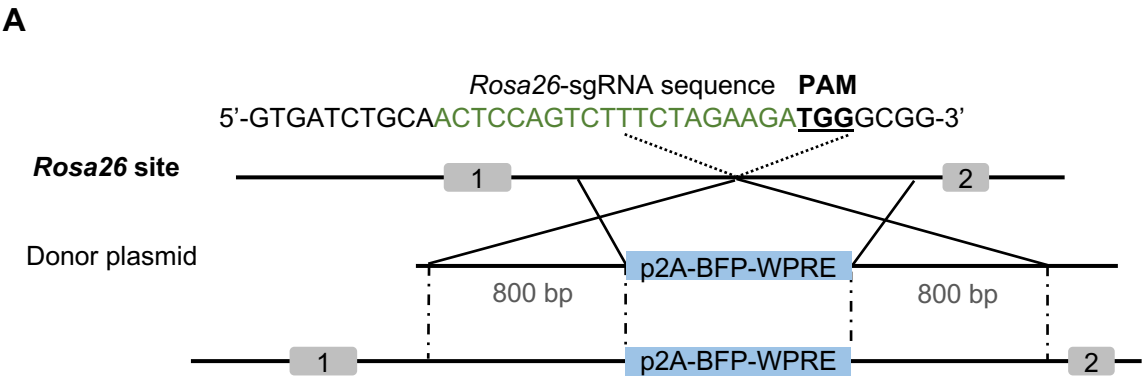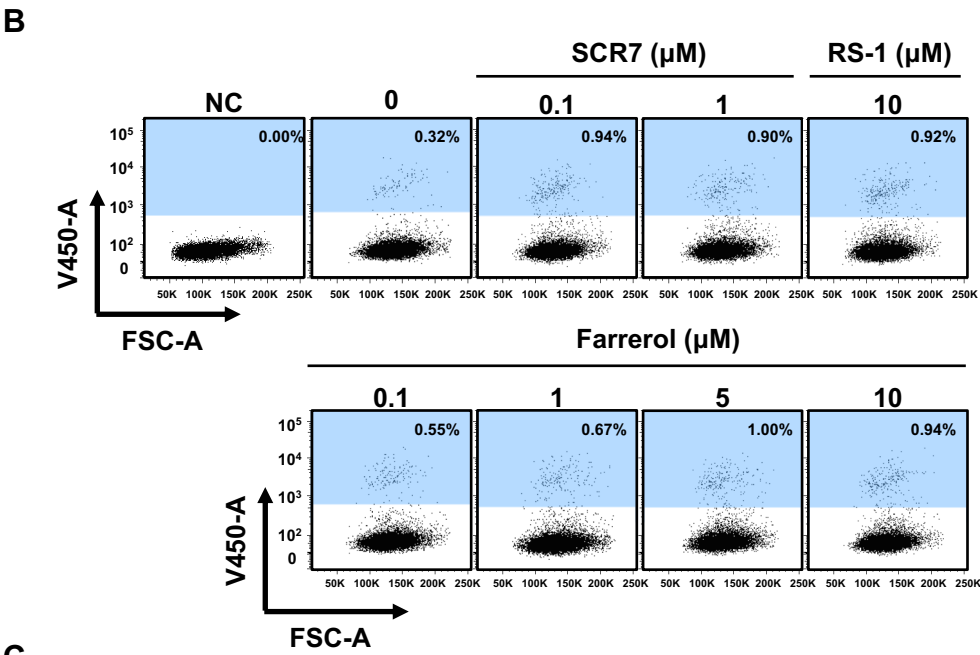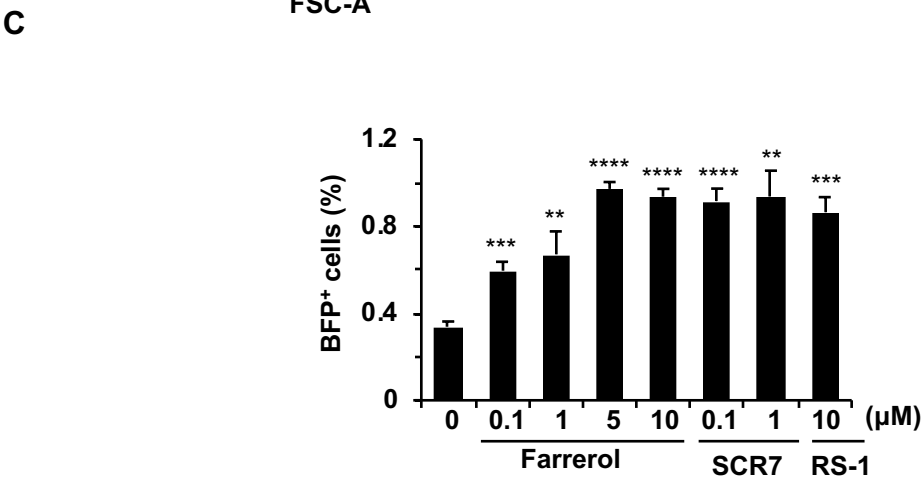

Figure 3 - figure supplement 1

Supplement: supp [file elife_poa_e56008_Figure_3_figure_supplement_1.pdf › elife_poa_e56008_Figure_3_figure_supplement_1.pdf]

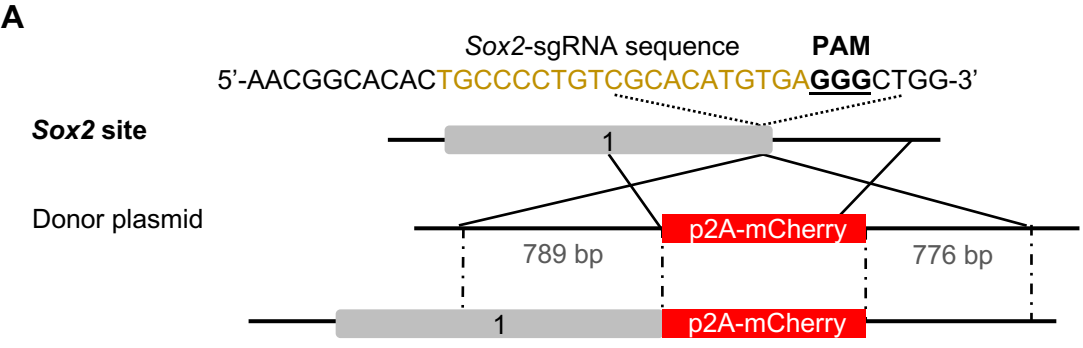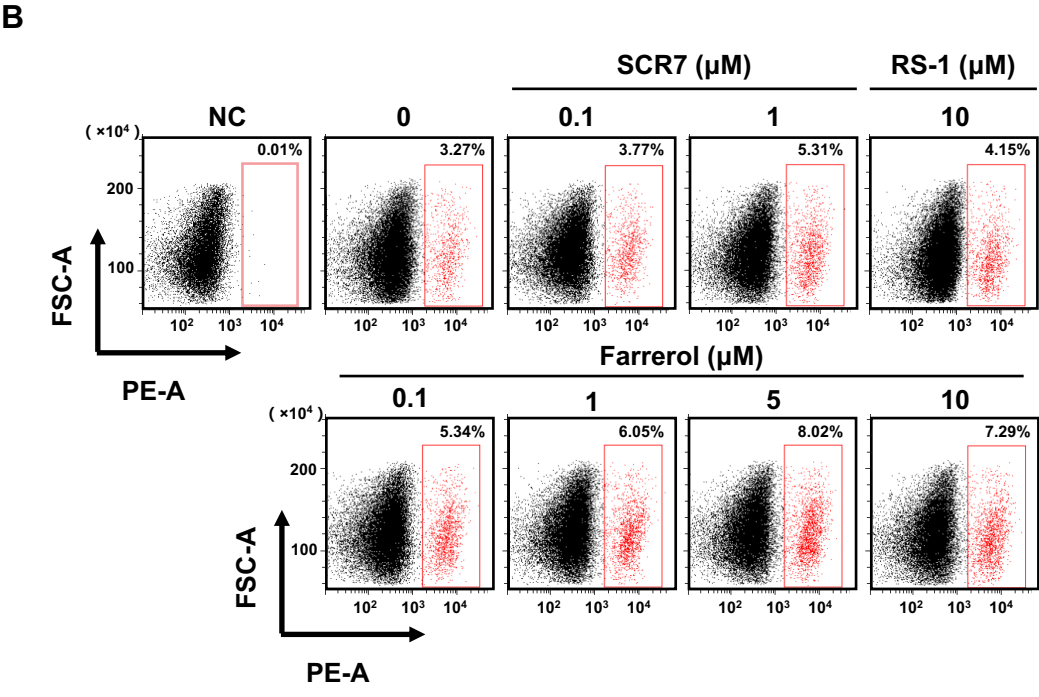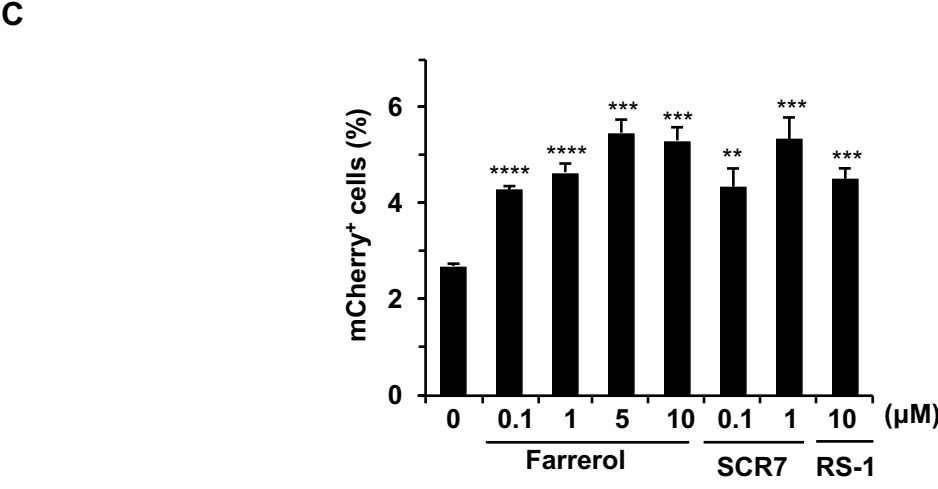

Figure 3 - figure supplement 2

Supplement: supp [file elife_poa_e56008_Figure_3_figure_supplement_2.pdf › elife_poa_e56008_Figure_3_figure_supplement_2.pdf]

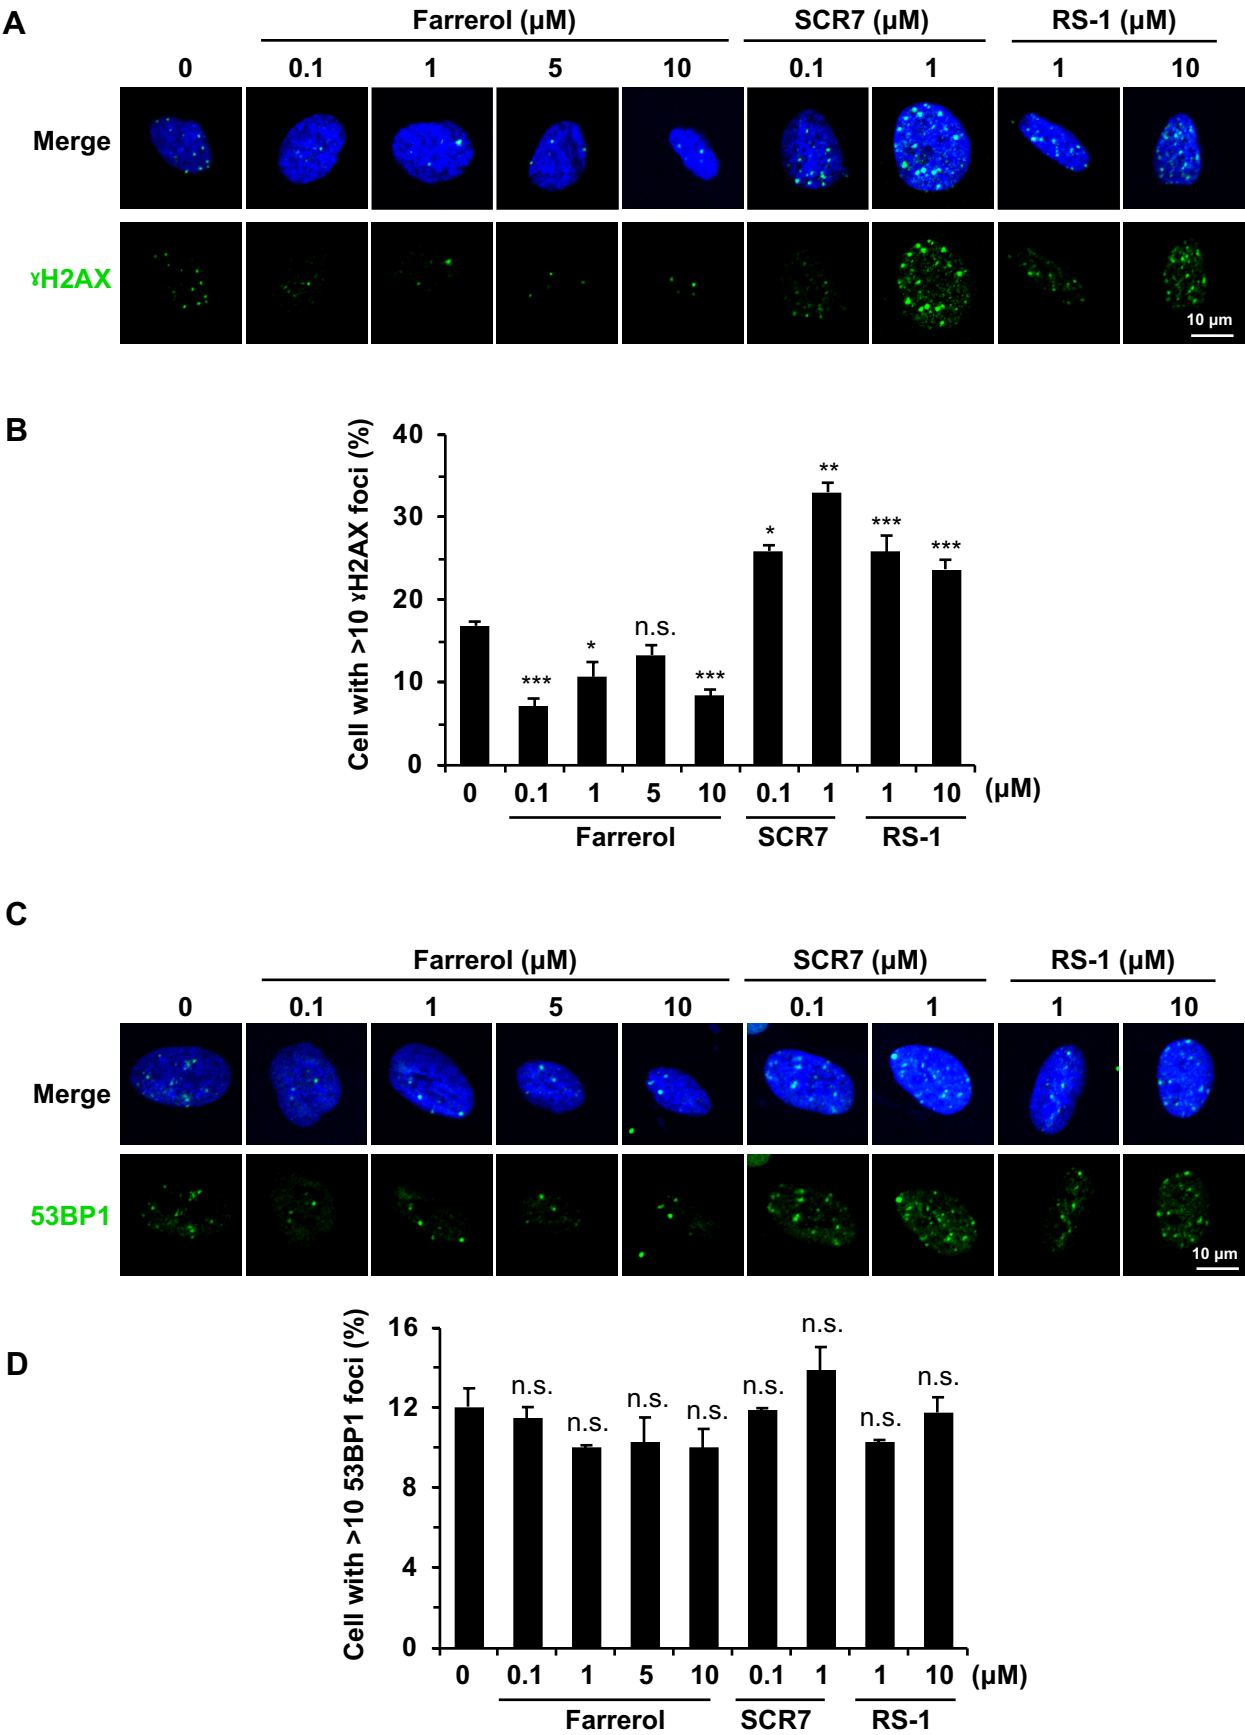

Figure 4 - figure supplement 1

Supplement: supp [file elife_poa_e56008_Figure_4_figure_supplement_1.pdf › elife_poa_e56008_Figure_4_figure_supplement_1.pdf]

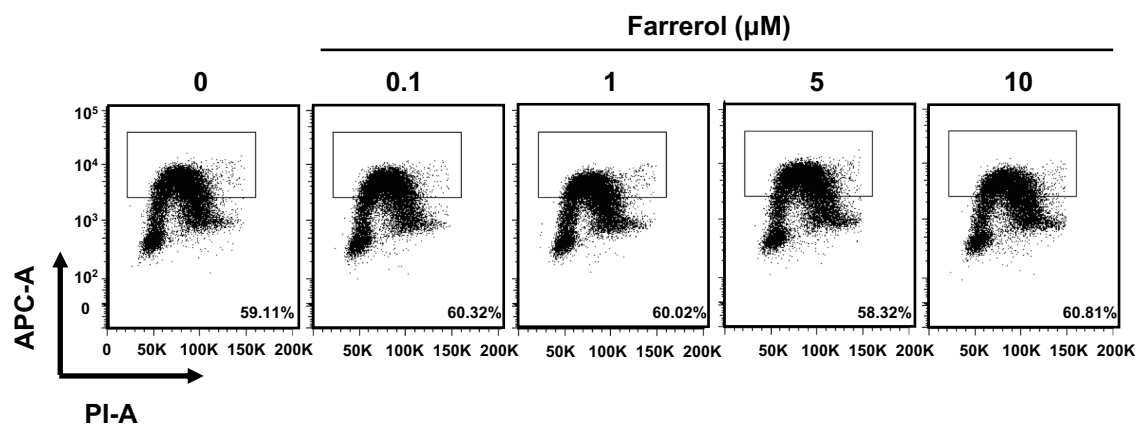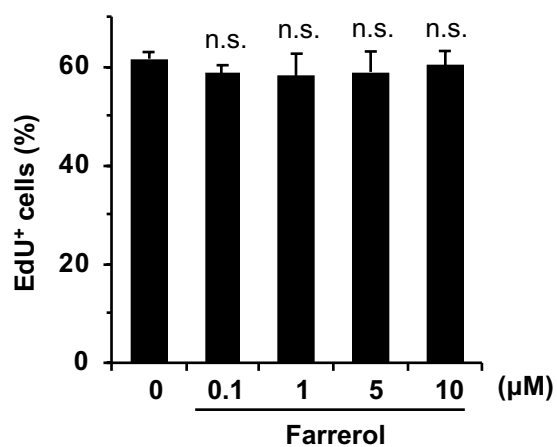

Figure 4 - figure supplement 2

Supplement: supp [file elife_poa_e56008_Figure_4_figure_supplement_2.pdf › elife_poa_e56008_Figure_4_figure_supplement_2.pdf]

A

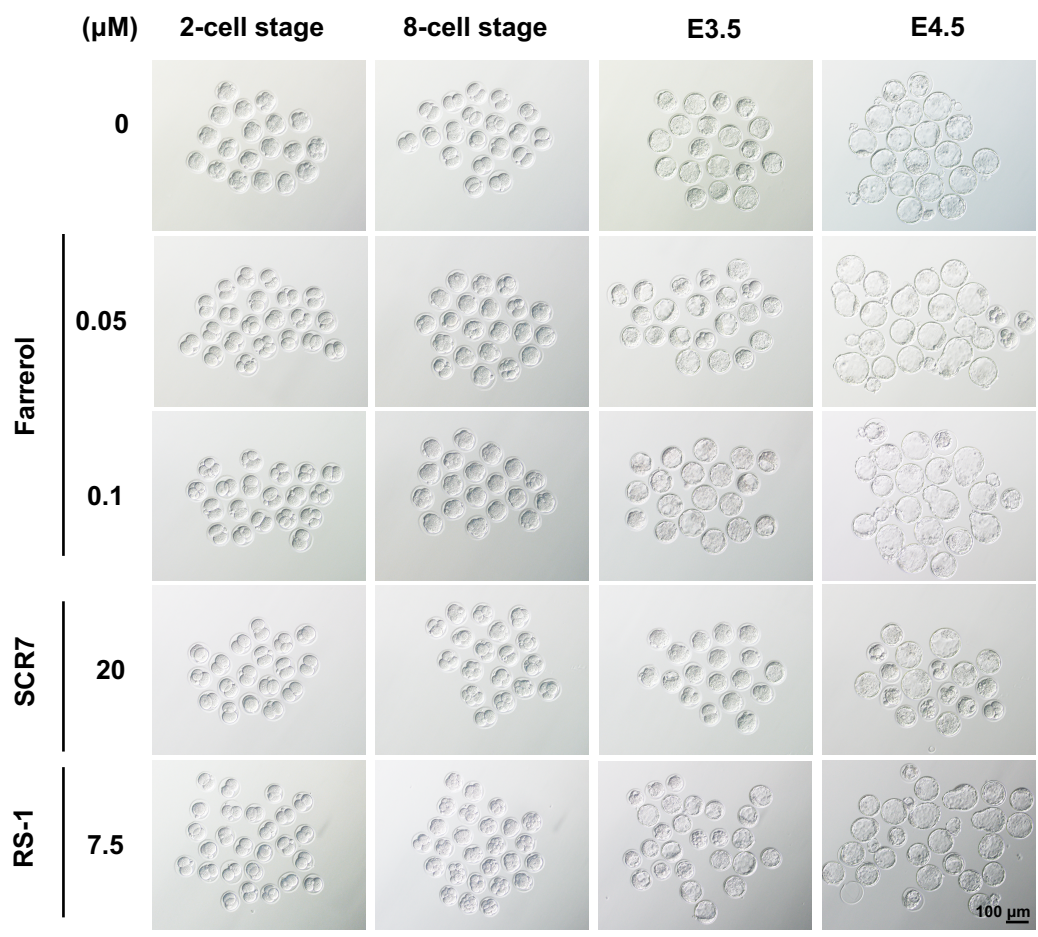

B

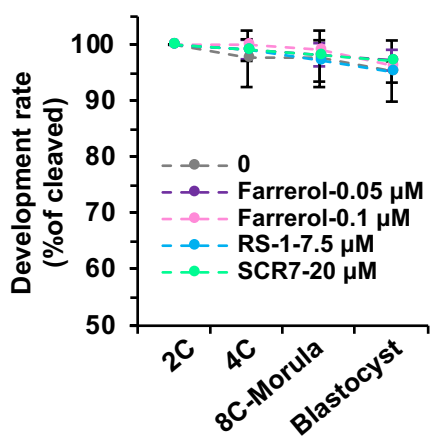

C

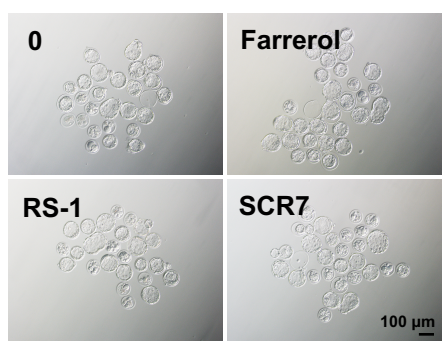

D

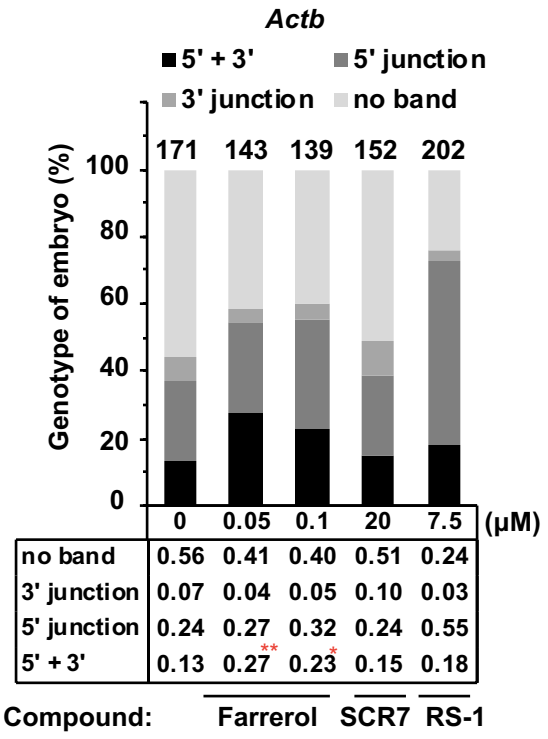

Figure 5 - figure supplement 1

Supplement: supp [file elife_poa_e56008_Figure_5_figure_supplement_1.pdf › elife_poa_e56008_Figure_5_figure_supplement_1.pdf]

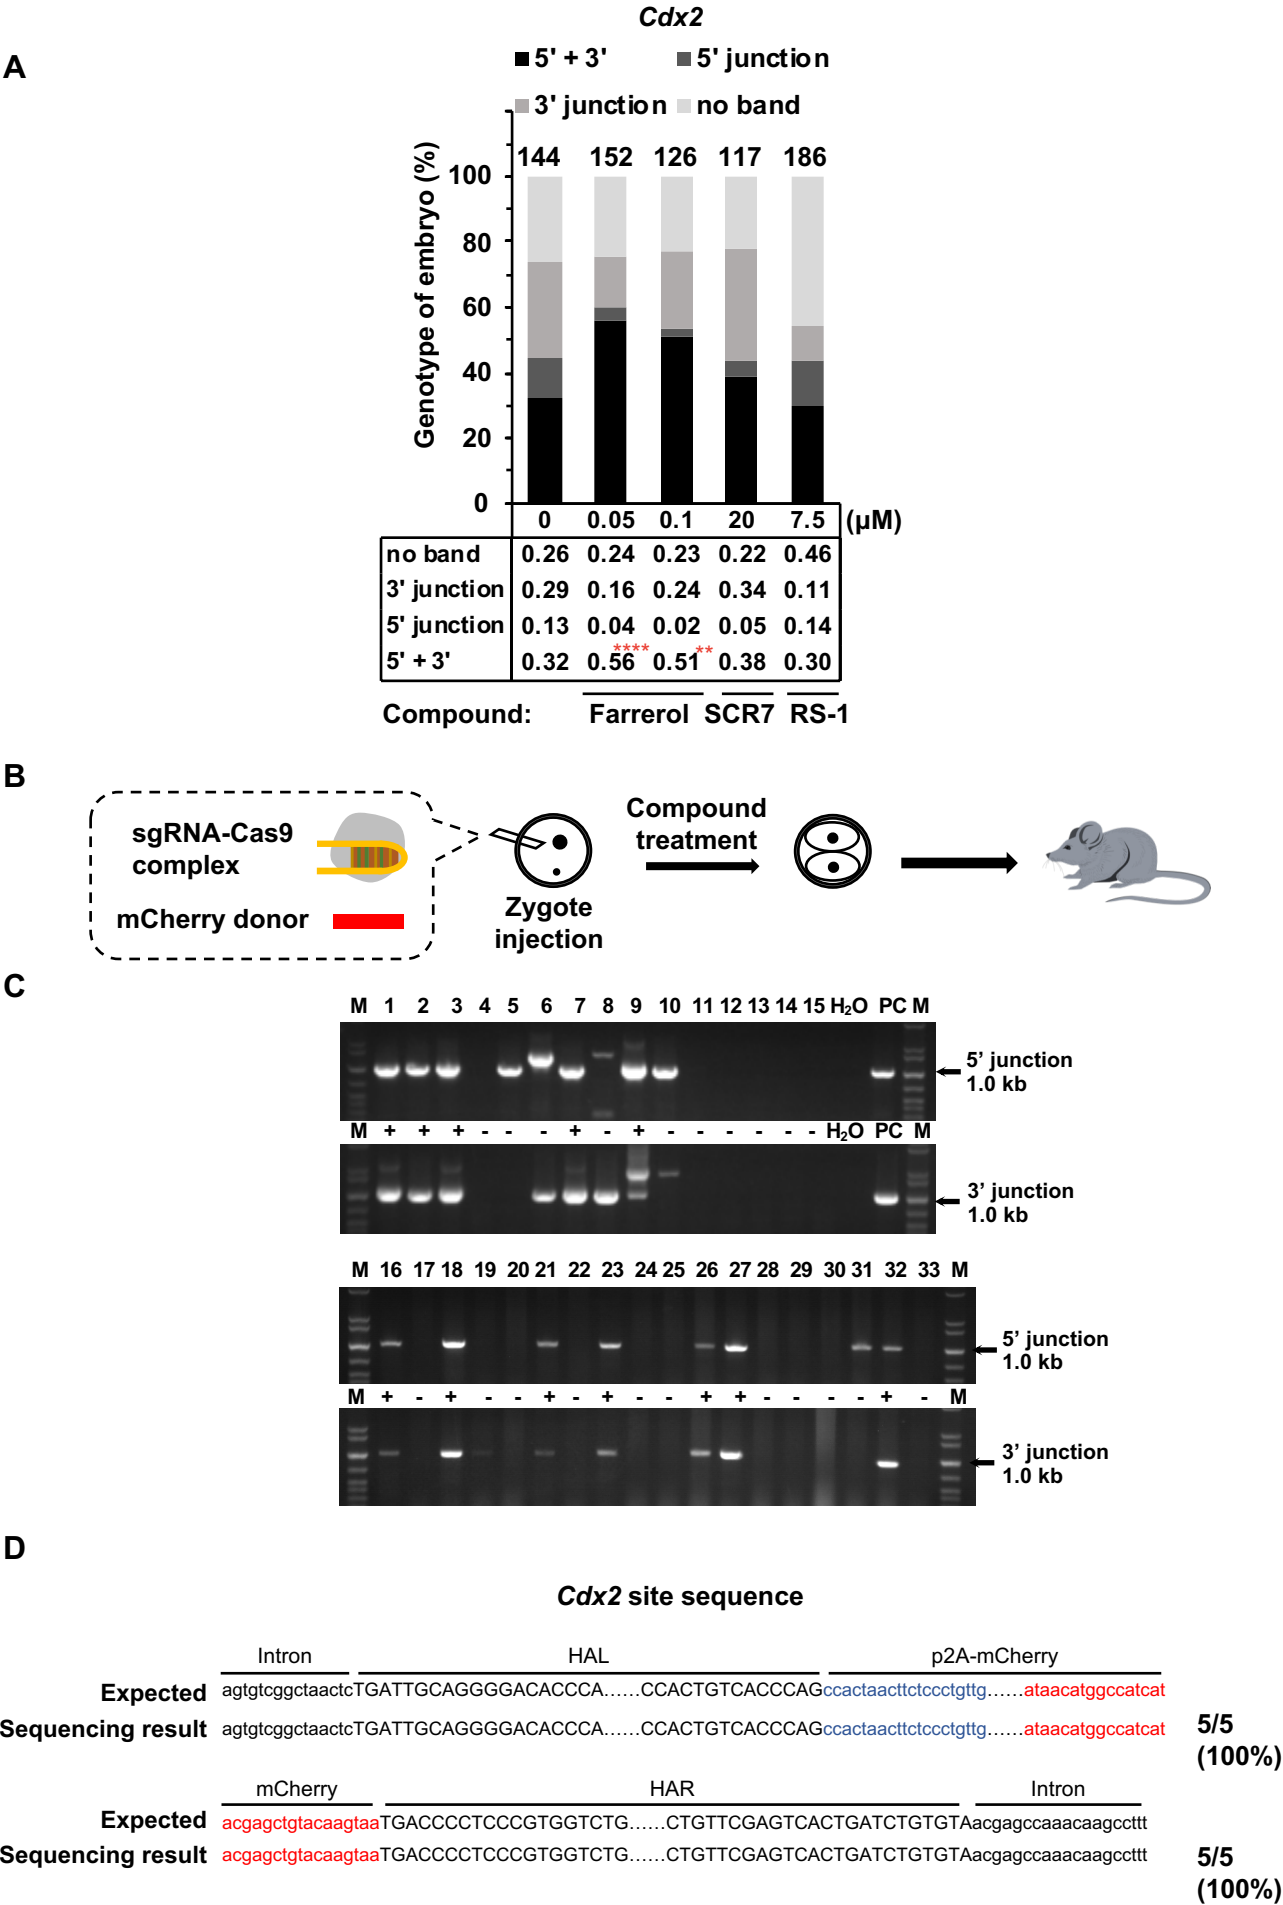

Figure 6 - figure supplement 1

Supplement: supp [file elife_poa_e56008_Figure_6_figure_supplement_1.pdf › elife_poa_e56008_Figure_6_figure_supplement_1.pdf]

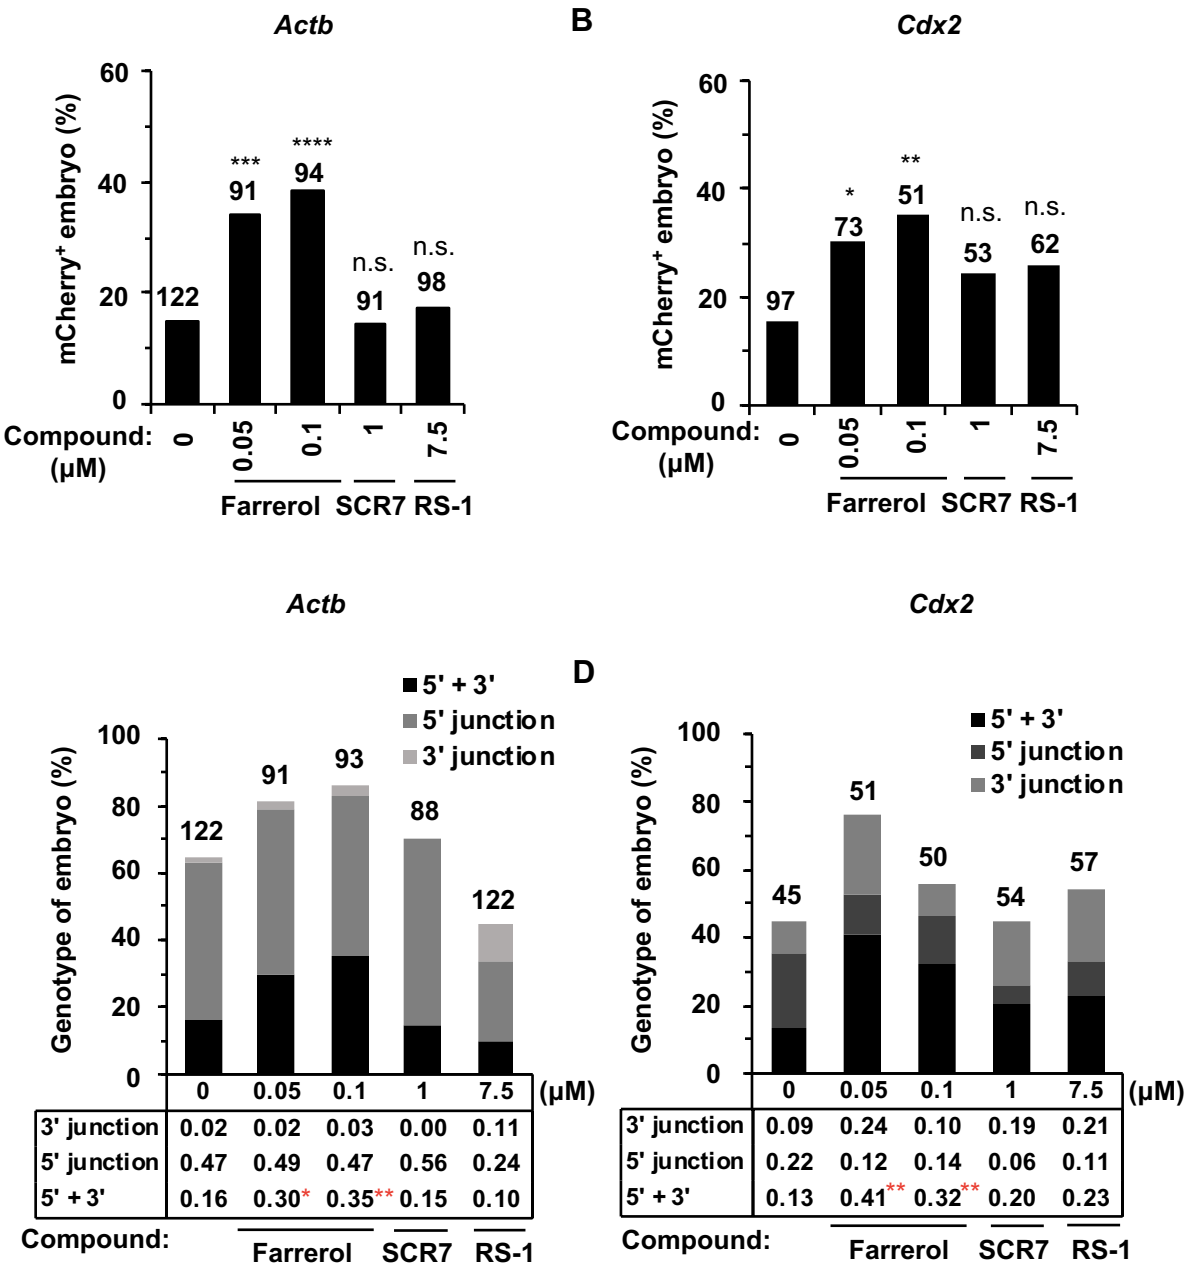

Figure 6 - figure supplement 2

Supplement: supp [file elife_poa_e56008_Figure_6_figure_supplement_2.pdf › elife_poa_e56008_Figure_6_figure_supplement_2.pdf]
